# Supplementary material for: Aviation Mutagenesis Alters the Content of Volatile Compounds in Dahongpao (Camellia sinensis) Leaves and Improves Tea Quality
Source: MDPI journal article supplement (doi:10.3390/foods13060946), 2024-03-20
Supplement: s1 [file s1]

## Supplementary data

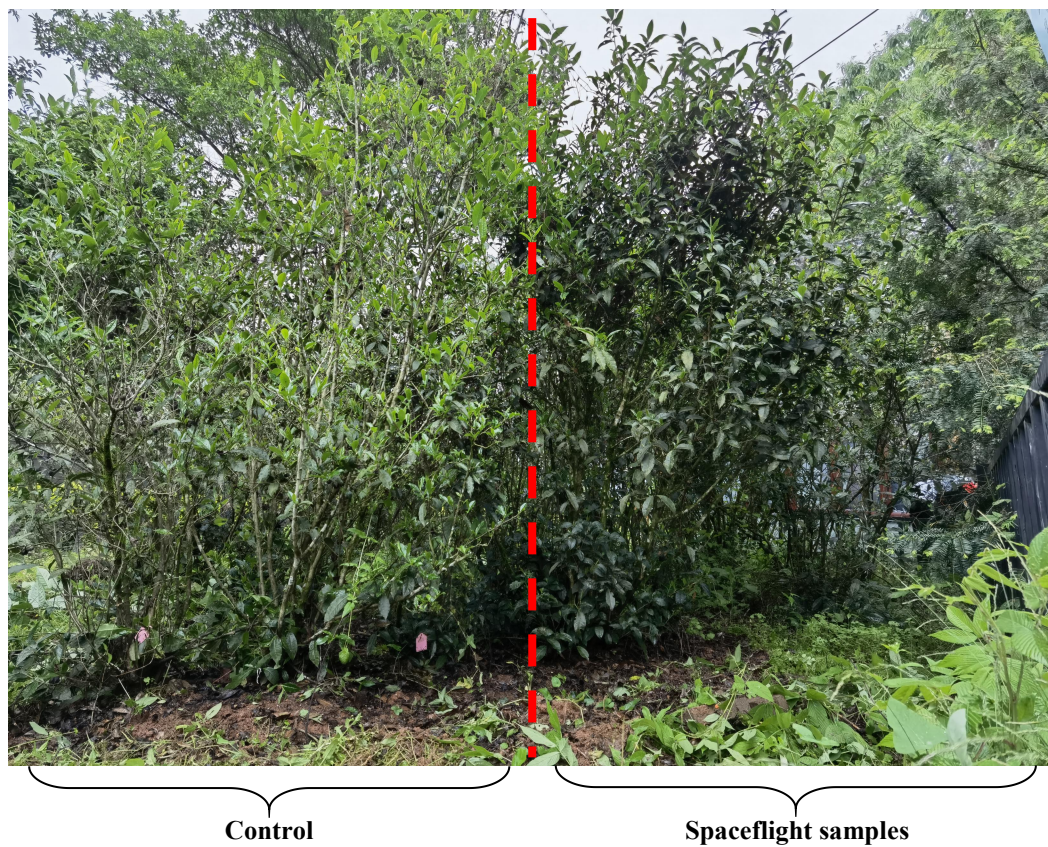

Figure S1. Aviation mutagenic and unmutagenic Dahongpao tea tree

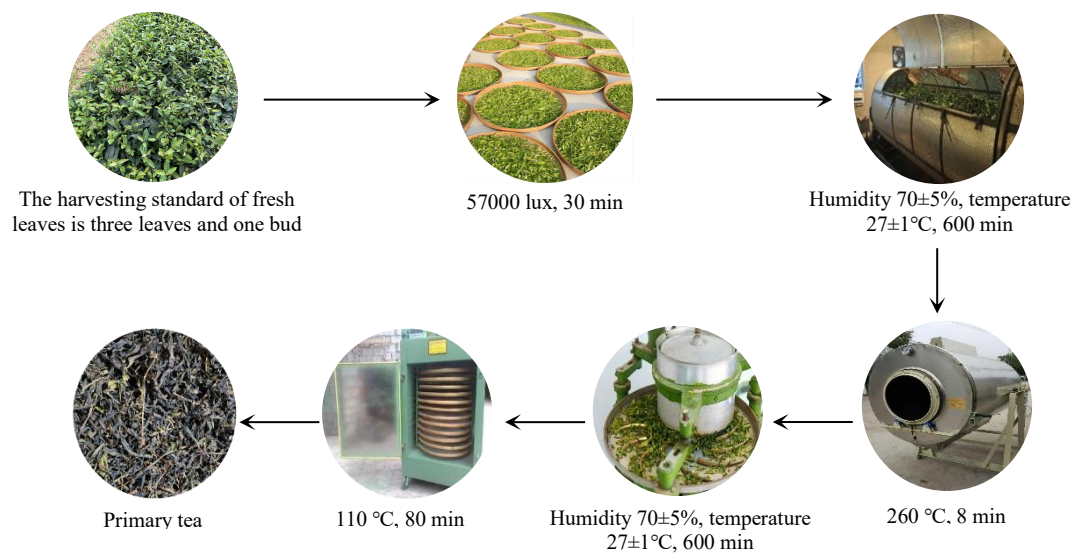

Figure S2. Primary processing of Dahongpao to obtain gross tea
