# Supplementary material for: Aviation Mutagenesis Alters the Content of Volatile Compounds in Dahongpao (Camellia sinensis) Leaves and Improves Tea Quality
Source: Foods. 2024 Mar 20;13(6):946. doi: 10.3390/foods13060946 (PMC10969991; doi:10.3390/foods13060946)
Supplement: Supplementary file 1 [file foods-13-00946-s001.zip › Table+S1+Raw+data+of+fresh+leaves.xlsx]

## Sheet: Table S1
Index	Quantitative ion	Qualitative ion	Molecular weight (Da)	Compounds	Class I	Formula	CAS	NIST20 RI	CK-1 (mAU*min)	CK-2 (mAU*min)	CK-3 (mAU*min)	TM-1 (mAU*min)	TM-2 (mAU*min)	TM-3 (mAU*min)
XMW0549	108	91	204.188	(1S,4aR,7R)-1,4a-Dimethyl-7-(prop-1-en-2-yl)-1,2,3,4,4a,5,6,7-octahydronaphthalene	Terpenoids	C15H24	52026-55-8	1447	0.0812249	0.082348	0.0747196	0	0	0
XMW0214	109	81	168.115	1(2H)-Naphthalenone, octahydro-4-hydroxy-, trans-	Ketone	C10H16O2	21766-50-7	1461	0.0478098	0.0422615	0.0379396	0	0	0
KMW0493	135	150	150.068	2-Methoxy-4-vinylphenol	Aromatics	C9H10O2	7786-61-0	1316	0.0243873	0.0233517	0.0209441	0	0	0
KMW0578	93	80	238.193	Butanoic acid, 3-methyl-, 1-ethenyl-1,5-dimethyl-4-hexenyl ester	Ester	C15H26O2	1118-27-0	1464	0.154214	0.132011	0.121457	0	0	0
KMW0483	41	57	170.167	Undecanal	Aldehyde	C11H22O	112-44-7	1307	0.0222572	0.0253769	0.0239181	0	0	0
XMW1089	99	41	184.146	Hexanoic acid, cyclopentyl ester	Ester	C11H20O2	5413-59-2	1325	0.0476658	0.0497955	0.0579757	0	0	0
XMW0022	95	109	168.115	Iridomyrmecin	Terpenoids	C10H16O2	485-43-8	1463	0.0934714	0.0715285	0.0232976	0	0	0
NMW0175	135	107	164.12	Phenol, 4-(1,1-dimethylpropyl)-	Phenol	C11H16O	80-46-6	1400	0.0335036	0.024684	0.0272898	0	0	0
WMW0081	107	136	136.089	cis-2-(2-Pentenyl)furan	Heterocyclic compound	C9H12O	70424-13-4	1002	0.0369691	0.024889	0.0211373	0	0	0
NMW0281	133	105	190.099	3-Butylisobenzofuran-1(3H)-one	Heterocyclic compound	C12H14O2	6066-49-5	1656	0.174438	0.0262211	0.0266806	0	0	0
D282	81	83	238.193	Citronellyl tiglate	Terpenoids	C15H26O2	24717-85-9	1658	0.115504	0.0513608	0.0487667	0	0	0
KMW0190	42	122	122.084	Pyrazine, trimethyl-	Heterocyclic compound	C7H10N2	14667-55-1	1004	0.0339122	0.0443784	0.0404615	0	0	0
KMW0424	103	57	186.162	Butanoic acid, 2-methyl-, hexyl ester	Ester	C11H22O2	10032-15-2	1236	0.0298369	0.0297586	0.0311415	0	0	0
KMW0204	69	56	144.115	Acetic acid, hexyl ester	Ester	C8H16O2	142-92-7	1014	0.0949547	0.102669	0.0889445	0	0	0
XMW1476	135	77	164.084	1-Propanone, 1-(4-methoxyphenyl)-	Ketone	C10H12O2	121-97-1	1513	0	0	0	0.0774164	0.0314397	0.264762
XMW0089	84	41	154.136	4-Decenal, (E)-	Aldehyde	C10H18O	65405-70-1	1198	0.0265588	0.0246781	0.0218397	0.0187751	0.0632383	0.0265214
XMW0186	95	43	124.089	3,5-Octadien-2-one, (E,E)-	Ketone	C8H12O	30086-02-3	1073	0	0	0	0.095729	0.0666293	0.0349114
XMW0487	92	65	138.043	2-Picoline, 6-nitro-	Heterocyclic compound	C6H6N2O2	18368-61-1	1183	3.91523	3.57144	3.90396	5.8542	3.94729	2.94413
WMW0007	107	93	204.188	[1S-(1.alpha.,7.alpha.,8a.beta.)]-1,2,3,5,6,7,8,8a-octahydro-1,4-dimethyl-7-(1-methylethenyl)-Azulene	Terpenoids	C15H24	3691-11-0	1505	0	0	0	0.0454436	0.031102	0.0245937
XMW0638	71	43	142.099	2,3'-Bifuran, octahydro-	Heterocyclic compound	C8H14O2	73373-15-6	1079	0.0480934	0.041723	0.0390894	0.125756	0.0726065	0.082622
KMW0092	98	41	98.037	2-Furanmethanol	Alcohol	C5H6O2	98-00-0	851	1.23502	1.40708	0.885084	2.11419	2.72712	1.1033
XMW0366	119	134	134.11	Benzene, 1,2,3,5-tetramethyl-	Aromatics	C10H14	527-53-7	1117	0.026604	0.0322699	0.0307975	0.1368	0.105836	0.0733941
XMW1440	69	41	154.063	2-methylprop-2-enoyl 2-methylprop-2-enoate	Others	C8H10O3	760-93-0	1054	0.0345659	0.0362168	0.028181	0.147822	0.173643	0.0800151
WMW0214	71	57	156.188	Nonane, 4,5-dimethyl-	Hydrocarbons	C11H24	17302-23-7	1046	0.121148	0.071124	0.133776	0.0565904	0.0331551	0.0936749
D299	69	41	154.136	Ethanol, 2-(3,3-dimethylcyclohexylidene)-, (Z)-	Alcohol	C10H18O	26532-23-0	1267	0.766447	0.678634	0.59463	1.6841	1.03781	1.17396
XMW0715	108	137	137.084	BenzenAmine, 4-ethoxy-	Amine	C8H11NO	156-43-4	1281	0	0	0	0.0608962	0.0340666	0.0488258
XMW0084	121	136	136.125	2,4,6-Octatriene, 2,6-dimethyl-	Terpenoids	C10H16	673-84-7	1131	0.224545	0.203782	0.179824	1.17675	1.05938	0.656243
KMW0207	95	96	128.03	2-Furanmethanethiol, 5-methyl-	Heterocyclic compound	C6H8OS	59303-05-8	995	0.0878635	0.121074	0.104685	0.398609	0.441367	0.22286
KMW0188	120	105	120.007	2-Methyl-1,3-dithiacyclopentane	Heterocyclic compound	C4H8S2	5616-51-3	1026	0.0337431	0.029401	0.0262123	0.119197	0.103056	0.0699663
D342	121	79	136.125	2,4,6-Octatriene, 2,6-dimethyl-, (E,E)-	Terpenoids	C10H16	3016-19-1	1144	0.28441	0.268132	0.242511	1.14951	1.17684	0.658284
XMW1389	136	121	136.089	2,3-Dimethylanisole	Ether	C9H12O	2944-49-2	1144	0.129497	0.126464	0.113945	0.527216	0.549626	0.308091
KMW0610	57	85	238.193	Bornyl isovalerate	Ester	C15H26O2	76-50-6	1484	0.203841	0.150254	0.199022	0.215259	0.151685	0.152837
D293	93	119	204.188	Cyclohexene, 4-[(1E)-1,5-dimethyl-1,4-hexadien-1-yl]-1-methyl-	Terpenoids	C15H24	25532-79-0	1512	0	0	0	0.064404	0.0567396	0.0401182
XMW0265	57	71	240.282	Tetradecane, 2,6,10-trimethyl-	Hydrocarbons	C17H36	14905-56-7	1539	0.0678104	0.0516704	0.0783423	0.0801507	0.0571536	0.0565753
XMW0170	134	133	134.073	BenzAldehyde, 3-ethyl-	Aldehyde	C9H10O	34246-54-3	1168	0	0	0	0.0452644	0.0323481	0.036373
XMW1448	137	109	152.12	3,6-Dimethyl-2,3,3a,4,5,7a-hexahydrobenzofuran	Heterocyclic compound	C10H16O	70786-44-6	1192	0.0673513	0.0629101	0.0760839	0.0845791	0.0708559	0.0543363
NMW0044	106	121	121.089	BenzenAmine, N-ethyl-	Amine	C8H11N	103-69-5	1128	0.043275	0.0300845	0.0275554	0.160435	0.168483	0.0987528
WMW0176	42	70	114.068	2H-Pyran-2-one, tetrahydro-6-methyl-	Heterocyclic compound	C6H10O2	823-22-3	1095	0.0438779	0.0583685	0.0590612	0.0735983	0.0887092	0.0474732
D197	67	109	152.12	3-Oxatricyclo[4.1.1.0(2,4)]octane, 2,7,7-trimethyl-	Terpenoids	C10H16O	1686-14-2	1095	0.293374	0.266573	0.296962	0.797783	0.775872	0.498629
KMW0602	57	71	212.25	Pentadecane	Hydrocarbons	C15H32	629-62-9	1500	0.0316632	0.0292115	0.0423272	0.0352288	0.0380266	0.0221461
D173	105	77	134.073	BenzeneacetAldehyde, 4-methyl-	Aldehyde	C9H10O	104-09-6	1120	0	0	0	0.69397	0.725928	0.436256
XMW0149	83	42	98.084	1H-Pyrazole, 4,5-dihydro-5,5-dimethyl-	Heterocyclic compound	C5H10N2	4320-85-8	983	0.022249	0.030866	0.033032	0.0516691	0.0441846	0.0337571
NMW0034	81	69	152.12	Fenchone	Terpenoids	C10H16O	1195-79-5	1096	0.203562	0.212486	0.219363	0.576585	0.558341	0.364971
WMW0086	136	94	136.038	DiSulfur compounds, ethyl 1-methylethyl	Sulfur compounds	C5H12S2	53966-36-2	985	0.393882	0.35413	0.301906	1.51133	1.64164	0.95988
XMW0417	79	93	136.125	Cyclohexene, 4-methyl-1-(1-methylethenyl)-	Hydrocarbons	C10H16	586-67-4	1073	0.0428089	0.0437946	0.0403586	0.118424	0.119325	0.0749064
KMW0454	68	79	150.104	1-Cyclohexene-1-carboxAldehyde, 4-(1-methylethenyl)-	Aldehyde	C10H14O	2111-75-3	1274	0.0393542	0.0414542	0.0366719	0.0769518	0.0501443	0.0631957
WMW0127	55	81	128.12	3-Octen-1-ol, (Z)-	Alcohol	C8H16O	20125-84-2	1055	0.207338	0.196808	0.167915	0.722043	0.803393	0.46747
XMW0987	131	119	202.172	Eudesma-2,4,11-triene	Terpenoids	C15H22	82462-31-5	1479	0.238278	0.173536	0.194452	0.227147	0.219073	0.146952
KMW0585	81	95	226.193	Citronellyl isobutyrate	Ester	C14H26O2	97-89-2	1483	0.511478	0.378519	0.434729	0.527123	0.482348	0.347708
XMW0793	79	41	162.141	1,7-Octadiene, 2,7-dimethyl-3,6-bis(methylene)-	Hydrocarbons	C12H18	16714-60-6	1083	0.124086	0.116358	0.114386	0.339249	0.289408	0.23019
XMW0269	85	57	186.126	2-Methylbutanoic anhydride	Others	C10H18O3	1468-39-9	1190	0.118818	0.0864199	0.133665	0.056036	0.0416878	0.0956648
XMW0961	95	93	196.146	Bornyl acetate	Terpenoids	C12H20O2	76-49-3	1285	0.0778407	0.0741365	0.0696632	0.168869	0.110106	0.147889
XMW0179	57	71	212.25	Dodecane, 2,6,11-trimethyl-	Hydrocarbons	C15H32	31295-56-4	1275	0.194695	0.113793	0.16682	0.126893	0.0764478	0.13621
XMW0119	69	41	140.12	Cyclopentanone, 2-methyl-3-(1-methylethyl)-	Ketone	C9H16O	54549-81-4	1028	0.0368503	0.0300717	0.0267267	0.0887806	0.119847	0.0662895
XMW1227	69	41	154.099	(E)-2-Methylbut-2-en-1-yl methacrylate	Ester	C9H14O2	88142-95-4	1088	0.101544	0.112961	0.110311	0.282229	0.294707	0.191011
GMW0113	41	39	146.022	Diallyl disulphide	Sulfur compounds	C6H10S2	2179-57-9	1081	0	0	0	0.208364	0.19862	0.141922
XMW0720	91	134	152.12	cis-p-Mentha-2,8-dien-1-ol	Terpenoids	C10H16O	3886-78-0	1140	0.317227	0.28381	0.11751	1.03258	1.12713	0.708751
KMW0629	55	69	186.198	1-Dodecanol	Alcohol	C12H26O	112-53-8	1474	0.343784	0.256498	0.295062	0.327838	0.296302	0.229214
XMW1429	70	82	113.059	1-(2-Hydroxyethyl)-1,2,4-triazole	Heterocyclic compound	C4H7N3O	3273-14-1	1095	0	0	0	0.18235	0.180647	0.125224
XMW1401	82	67	184.146	n-Valeric acid cis-3-hexenyl ester	Ester	C11H20O2	35852-46-1	1237	0.317818	0.337752	0.389923	0.0535892	0.0441507	0.0392568
XMW0153	121	136	136.125	1,3-Cyclopentadiene, 1,2,3,4,5-pentamethyl-	Hydrocarbons	C10H16	4045-44-7	983	0.772868	0.636402	0.559678	2.33711	2.55892	1.70215
KMW0193	93	41	136.125	.beta.-Pinene	Terpenoids	C10H16	127-91-3	981	13.3609	11.2163	9.72653	41.1775	44.8493	29.9669
XMW0438	107	79	136.089	Furan, 2-(1-pentenyl)-, (E)-	Heterocyclic compound	C9H12O	20992-69-2	1000	0.378996	0.324107	0.286092	1.27396	1.38453	0.926891
KMW0244	121	136	136.1	Pyrazine, 2-methyl-5-(1-methylethyl)-	Heterocyclic compound	C8H12N2	13925-05-8	1059	0.0874814	0.0678381	0.0608018	0.23779	0.266579	0.174239
KMW0447	41	81	154.136	3,6-Octadien-1-ol, 3,7-dimethyl-, (Z)-	Terpenoids	C10H18O	5944-20-7	1240	0.306493	0.294413	0.285171	0.492412	0.5078	0.357452
KMW0306	57	71	156.188	Undecane	Hydrocarbons	C11H24	1120-21-4	1100	0.699183	0.108682	0.73587	0.883894	0.809051	0.655259
XMW0522	92	121	121.089	Pyridine, 3-propyl-	Heterocyclic compound	C8H11N	4673-31-8	986	1.6883	1.40705	1.25166	4.58654	4.94273	3.35108
KMW0070	91	106	106.078	Benzene, 1,3-dimethyl-	Aromatics	C8H10	108-38-3	866	0.0284838	0.0400739	0.0314084	0.0306881	0.0317766	0.0224041
XMW0202	69	41	138.141	cis-2,6-Dimethyl-2,6-octadiene	Hydrocarbons	C10H18	2492-22-0	985	5.14322	4.30883	3.84225	15.2934	16.5816	11.3176
NMW0031	84	42	141.115	Hygrine	Heterocyclic compound	C8H15NO	496-49-1	1092	0.0649316	0.0637621	0.0689113	0.140488	0.157285	0.104722
KMW0473	79	107	150.104	4-Isopropylcyclohexa-1,3-dienecarbAldehyde	Aldehyde	C10H14O	1197-15-5	1283	0	0	0	0.173537	0.191303	0.129006
XMW0177	109	79	124.089	Ethanone, 1-(2-methyl-1-cyclopenten-1-yl)-	Ketone	C8H12O	3168-90-9	996	0.0690928	0.0544876	0.0567979	0.0905863	0.0943323	0.0670079
XMW0110	57	71	198.235	Dodecane, 4,6-dimethyl-	Hydrocarbons	C14H30	61141-72-8	1325	0.0711457	0.0516129	0.0604716	0.0538294	0.0385385	0.0492569
D271	57	56	158.131	Propanoic acid, hexyl ester	Ester	C9H18O2	2445-76-3	1108	0.74044	0.722313	0.758857	0.888842	0.809051	0.671773
XMW0521	68	79	136.125	1,7-Octadiene, 2-methyl-6-methylene-	Terpenoids	C10H16	1686-30-2	984	0.526524	0.459059	0.42059	1.15075	1.26021	0.859486
KMW0267	105	77	136.052	Benzoic acid, methyl ester	Ester	C8H8O2	93-58-3	1094	0.837699	0.896738	0.855732	1.43659	1.15447	1.1696
XMW0192	93	121	136.125	(+)-4-Carene	Terpenoids	C10H16	29050-33-7	1009	0.263588	0.32217	0.224091	0.738066	0.831767	0.556925
KMW0192	122	107	122.073	Benzene, 1-methoxy-2-methyl-	Ether	C8H10O	578-58-5	1008	0.0602858	0.04869	0.0478132	0.183466	0.20204	0.138357
KMW0223	121	93	136.125	1,3-Cyclohexadiene, 1-methyl-4-(1-methylethyl)-	Terpenoids	C10H16	99-86-5	1012	0.592804	0.510002	0.447842	1.7542	1.93961	1.3244
XMW1068	115	58	115.038	4-Methylurazole	Heterocyclic compound	C3H5N3O2	16312-79-1	1039	0.0650446	0.047009	0.0464319	0.188293	0.220527	0.144802
XMW0933	119	134	194.131	Bicyclo[3.1.1]hept-2-en-6-ol, 2,7,7-trimethyl-, acetate, [1S-(1.alpha.,5.alpha.,6.beta.)]-	Ester	C12H18O2	50764-55-1	1239	0	0	0	0.109432	0.122987	0.0831369
NMW0023	91	119	120.058	BenzAldehyde, 2-methyl-	Aldehyde	C8H8O	529-20-4	1064	0.154569	0.149832	0.141107	0.505035	0.460812	0.388662
KMW0459	41	69	152.12	2,6-Octadienal, 3,7-dimethyl-, (E)-	Terpenoids	C10H16O	141-27-5	1270	0.371173	0.334276	0.297399	0.724059	0.598011	0.586844
KMW0382	108	107	108.058	Phenol, 2-methyl-	Phenol	C7H8O	95-48-7	1054	0.0541006	0.0470865	0.0390298	0.178012	0.188938	0.134315
XMW0076	92	65	92.037	1H-Pyrrole-3-carbonitrile	Heterocyclic compound	C5H4N2	7126-38-7	1044	2.05288	1.70499	1.49552	6.38291	7.23273	4.87661
KMW0280	95	43	124.089	3,5-Octadien-2-one	Ketone	C8H12O	38284-27-4	1091	0.102742	0.110364	0.111262	0.281151	0.284251	0.212448
KMW0212	91	92	120.058	BenzeneacetAldehyde	Aldehyde	C8H8O	122-78-1	1049	1.82642	1.5678	1.33415	5.629	6.3706	4.32004
KMW0247	93	77	136.125	.beta.-Phellandrene	Terpenoids	C10H16	555-10-2	1031	3.79813	2.7368	2.26834	11.8033	13.3311	9.05989
KMW0182	81	82	138.104	Furan, 2-pentyl-	Heterocyclic compound	C9H14O	3777-69-3	993	0	0	0	0.561774	0.589867	0.426629
KMW0226	68	93	136.125	Limonene	Terpenoids	C10H16	138-86-3	1026	1.34054	1.14316	0.984889	3.06276	3.42089	2.34676
XMW1286	97	98	98.048	1H-Imidazole-4-methanol	Heterocyclic compound	C4H6N2O	822-55-9	1080	0.143797	0.126355	0.120648	0.333854	0.327724	0.254427
XMW3734	122	121	122.037	2-hydroxy-BenzAldehyde	Aldehyde	C7H6O2	90-02-8	1047	0.0347027	0.0253208	0.0233795	0.104784	0.113524	0.0801426
XMW1218	58	43	172.146	2-Nonanone, 3-(hydroxymethyl)-	Ketone	C10H20O2	67801-33-6	1093	0.0282223	0.0249562	0.024484	0.0556671	0.0579221	0.0424631
KMW0257	136	93	154.136	Bicyclo[3.1.0]hexan-2-ol, 2-methyl-5-(1-methylethyl)-, (1.alpha.,2.beta.,5.alpha.)-	Terpenoids	C10H18O	15537-55-0	1070	0.136952	0.118095	0.109529	0.382693	0.423709	0.294173
WMW0105	41	69	152.157	1,7-Nonadiene, 4,8-dimethyl-	Hydrocarbons	C11H20	62108-28-5	1026	0	0	0	0.576042	0.634774	0.444375
XMW0714	94	109	109.053	3-Acetyl-1H-pyrroline	Heterocyclic compound	C6H7NO	1072-82-8	1035	0.520087	0.468861	0.404982	1.63806	1.81284	1.2669
KMW0235	93	41	136.125	1,3,6-Octatriene, 3,7-dimethyl-, (Z)-	Terpenoids	C10H16	3338-55-4	1038	5.10936	3.55085	3.82304	14.9692	16.6931	11.607
D246	69	93	224.178	Propanoic acid, 2-methyl-, 3,7-dimethyl-2,6-octadienyl ester, (Z)-	Ester	C14H24O2	2345-24-6	1475	0.331168	0.266982	0.289154	0.27698	0.253429	0.21769
WMW0126	67	95	124.125	1,3-Hexadiene, 3-ethyl-2-methyl-	Hydrocarbons	C9H16	61142-36-7	1031	0.878407	0.663965	0.525715	2.35953	2.63281	1.83328
D409	81	59	154.136	(S)-2,5-Dimethyl-3-vinylhex-4-en-2-ol	Alcohol	C10H18O	35671-15-9	1039	0	0	0	0.99201	1.09783	0.770415
D364	81	82	138.079	2-Ethoxy-3-methylpyrazine	Heterocyclic compound	C7H10N2O	32737-14-7	1065	0.219032	0.22568	0.212298	0.258548	0.274992	0.200642
XMW1127	56	70	158.131	Formic acid, octyl ester	Ester	C9H18O2	112-32-3	1114	1.13581	1.25106	1.18866	1.76305	1.7165	1.37747
WMW0082	41	55	152.157	1,10-Undecadiene	Hydrocarbons	C11H20	13688-67-0	1095	3.08484	3.35809	3.1683	4.90709	4.19456	4.0405
XMW0486	82	56	140.12	Cyclohexanone, 2,2,6-trimethyl-	Ketone	C9H16O	2408-37-9	1036	0.0872169	0.0886437	0.094618	0.101127	0.107195	0.0787838
WMW0100	55	41	142.136	3-Nonen-1-ol, (E)-	Alcohol	C9H18O	10339-61-4	1143	0	0	0	0.0233455	0.0195054	0.0512321
XMW0011	119	105	134.11	Benzene, 1,4-diethyl-	Aromatics	C10H14	105-05-5	1041	0.23736	0.187674	0.146323	0.703453	0.77191	0.551815
KMW0266	97	45	129.991	2-Thiophenemethanethiol	Heterocyclic compound	C5H6S2	6258-63-5	1105	0.646309	0.777369	0.636611	0.663584	0.81459	0.541945
KMW0323	79	108	108.058	Benzyl Alcohol	Alcohol	C7H8O	100-51-6	1036	1.99114	1.76443	1.514	5.77471	6.44145	4.55491
XMW1311	65	122	122.037	2-Propenal, 3-(2-furanyl)-	Heterocyclic compound	C7H6O2	623-30-3	1111	0.333746	0.364826	0.338236	0.552146	0.470864	0.458346
D313	73	45	172.146	3-Hexene, 1-(1-ethoxyethoxy)-, (Z)-	Aldehyde	C10H20O2	28069-74-1	1102	0.290979	0.0349791	0.0460137	0.306139	0.24427	0.269424
XMW0279	67	45	114.104	E-1-Methoxy-4-hexene	Hydrocarbons	C7H14O	134777-60-9	801	0.672643	0.611031	0.737249	0.66037	0.586631	0.538825
KMW0469	137	152	152.084	Phenol, 4-ethyl-2-methoxy-	Phenol	C9H12O2	2785-89-9	1282	0	0	0	0.343758	0.347859	0.271129
NMW0016	82	67	142.099	Acetic acid, cyclohexyl ester	Ester	C8H14O2	622-45-7	1043	0.0503341	0.0411881	0.0378153	0.0820672	0.0957115	0.0661203
D272	70	85	172.146	Butanoic acid, 3-methyl-, 2-methylbutyl ester	Ester	C10H20O2	2445-77-4	1107	1.03251	1.1624	1.10777	1.58848	1.56814	1.259
XMW1203	42	41	114.032	2,5-Furandione, dihydro-3-methyl-	Heterocyclic compound	C5H6O3	4100-80-5	1057	0.0307691	0.025391	0.0290212	0.0937882	0.107122	0.0752705
D81	81	94	168.079	2-Furanpropanoic acid, ethyl ester	Heterocyclic compound	C9H12O3	10031-90-0	1192	0.0983031	0.113843	0.11837	0.12898	0.13448	0.102357
KMW0291	71	93	154.136	Linalool	Terpenoids	C10H18O	78-70-6	1099	9.72207	12.0433	9.87988	17.3938	17.3946	13.8936
XMW0410	55	83	142.136	1-Nonen-4-ol	Alcohol	C9H18O	35192-73-5	1103	5.66842	6.13651	5.78002	7.3457	7.17191	5.9014
KMW0220	93	91	136.125	3-Carene	Terpenoids	C10H16	13466-78-9	1009	0.436705	0.280644	0.261236	1.11005	1.41642	0.947748
XMW0771	68	67	136.125	1,5-Cyclooctadiene, 3,4-dimethyl-	Hydrocarbons	C10H16	21284-05-9	1046	0.111153	0.0856595	0.0740491	0.324153	0.35917	0.261402
XMW0925	93	108	150.104	Camphenone, 6-	Ketone	C10H14O	55659-42-2	1114	10.4563	11.1547	10.7395	18.6863	19.0167	14.9906
XMW0159	57	71	226.266	2,6,10-Trimethyltridecane	Hydrocarbons	C16H34	3891-99-4	1449	0.0785494	0.0592582	0.109708	0.0710501	0.0647426	0.058633
KMW0312	69	81	150.104	Furan, 3-(4-methyl-3-pentenyl)-	Terpenoids	C10H14O	539-52-6	1101	4.91135	5.16765	5.03211	6.12889	6.00208	4.97892
KMW0301	93	43	154.136	Bicyclo[3.1.0]hexan-2-ol, 2-methyl-5-(1-methylethyl)-, (1.alpha.,2.alpha.,5.alpha.)-	Terpenoids	C10H18O	17699-16-0	1070	0.128813	0.124587	0.132509	0.31443	0.335095	0.254813
KMW0287	67	41	138.104	(Z,Z)-3,6-Nonadienal	Aldehyde	C9H14O	21944-83-2	1100	2.97811	3.20009	3.1026	3.87319	3.80077	3.15337
KMW0488	57	71	184.219	Tridecane	Hydrocarbons	C13H28	629-50-5	1300	0.0649359	0.0563928	0.087826	0.0605456	0.047418	0.0570024
KMW0460	69	41	154.136	Geraniol	Terpenoids	C10H18O	106-24-1	1255	0.469329	0.458334	0.431805	0.491237	0.530971	0.40257
KMW0150	105	120	120.094	Benzene, 1,2,4-trimethyl-	Aromatics	C9H12	95-63-6	990	0.334006	0.271956	0.254918	0.877693	0.959032	0.722266
NMW0101	121	136	168.115	Ascaridole	Terpenoids	C10H16O2	512-85-6	1244	0.0820877	0.0665646	0.0772716	0.0738888	0.102974	0.0693188
KMW0534	56	57	200.178	Butyl caprylate	Ester	C12H24O2	589-75-3	1389	0.0501556	0.0291561	0.037602	0.0363895	0.0312291	0.0321019
XMW1471	84	42	127.136	1-ButanAmine, N-methyl-N-2-propenyl-	Amine	C8H17N	24209-62-9	856	0.600649	0.424731	0.418914	0.5692	0.587688	0.471598
KMW0208	57	43	142.172	Decane	Hydrocarbons	C10H22	124-18-5	1000	0.181764	0.186299	0.183112	0.0926718	0.0897022	0.0775578
KMW0234	119	134	134.11	p-Cymene	Aromatics	C10H14	99-87-6	1027	0.848637	0.8022	0.652469	1.80002	2.05495	1.51413
NMW0025	94	43	136.052	Acetic acid, phenyl ester	Ester	C8H8O2	122-79-2	1067	0.144439	0.169861	0.195336	0.407655	0.396818	0.34232
NMW0287	79	67	232.219	1,8,11,14-Heptadecatetraene, (Z,Z,Z)-	Hydrocarbons	C17H28	10482-53-8	1664	0.093805	0.0552661	0.0541824	0.0598497	0.0653351	0.0503264
XMW1491	93	69	252.209	Lavandulyl caproate	Ester	C16H28O2	59550-36-6	1650	0.0471519	0.0786452	0.0779198	0.117848	0.158672	0.109456
KMW0453	93	80	196.146	Linalyl acetate	Terpenoids	C12H20O2	115-95-7	1257	0.727235	0.560839	0.623709	0.601443	0.69263	0.512617
KMW0386	67	95	152.12	cis-Dihydrocarvone	Terpenoids	C10H16O	3792-53-8	1195	0.20464	0.196392	0.189558	0.156933	0.226757	0.155748
KMW0413	82	54	150.104	(-)-Carvone	Terpenoids	C10H14O	6485-40-1	1254	1.01788	0.826749	0.797208	0.844078	0.973189	0.723249
XMW1320	69	41	154.099	4-Isopropyl-1,3-cyclohexanedione	Ketone	C9H14O2	62831-62-3	1258	0.46633	0.455956	0.431805	0.462134	0.505941	0.391614
WMW0205	99	71	142.099	2,5-Octanedione	Ketone	C8H14O2	3214-41-3	984	0.0235793	0.0247471	0.0233207	0.0221275	0.0194989	0.0243654
NMW0105	107	136	136.089	Phenol, 4-propyl-	Phenol	C9H12O	645-56-7	1260	1.60149	1.57402	1.52734	1.60816	1.83283	1.37564
D188	80	123	123.043	Pyrazinamide	Heterocyclic compound	C5H5N3O	98-96-4	1250	0.428915	0.421582	0.400313	0.359406	0.421286	0.31078
KMW0551	57	71	198.235	Tetradecane	Hydrocarbons	C14H30	629-59-4	1400	0.292106	0.128995	0.280939	0.167567	0.136256	0.162759
XMW0937	119	109	194.131	(1R,5S,6R)-2,7,7-Trimethylbicyclo[3.1.1]hept-2-en-6-yl acetate	Ester	C12H18O2	67999-48-8	1262	0.0401221	0.0337895	0.0301212	0.0939891	0.102144	0.080215
D407	68	69	154.136	7-Octen-4-ol, 2-methyl-6-methylene-, (S)-	Terpenoids	C10H18O	35628-05-8	1097	1.80774	1.88984	1.86435	2.15821	2.32398	1.85901
XMW1118	55	83	112.089	CyclohexanecarboxAldehyde	Aldehyde	C7H12O	2043-61-0	963	0.114049	0.111563	0.105909	0.066011	0.0736644	0.0571617
D191	110	95	166.099	2-Hexanoylfuran	Heterocyclic compound	C10H14O2	14360-50-0	1239	3.53117	3.3639	3.26495	3.46018	3.67638	2.98286
KMW0274	126	71	126.032	Maltol	Heterocyclic compound	C6H6O3	118-71-8	1110	0.0357251	0.0429458	0.034886	0.0454283	0.0561972	0.0409509
KMW0294	57	41	128.12	2-Octen-1-ol, (E)-	Alcohol	C8H16O	18409-17-1	1067	0	0	0	0.0248037	0.0245833	0.0215517
XMW0201	69	41	98.073	4-Hexen-3-one	Ketone	C6H10O	2497-21-4	855	4.90085	11.0859	8.81254	10.9052	11.5398	9.42877
KMW0376	45	69	144.151	2-Nonanol	Alcohol	C9H20O	628-99-9	1102	0.220122	0.230081	0.244579	0.27949	0.282831	0.24288
KMW0350	108	91	150.068	Acetic acid, phenylmethyl ester	Ester	C9H10O2	140-11-4	1162	0.0601854	0.0938411	0.0933364	0.0630642	0.0701546	0.0554159
KMW0302	139	69	154.136	(2S,4R)-4-Methyl-2-(2-methylprop-1-en-1-yl)tetrahydro-2H-pyran	Terpenoids	C10H18O	3033-23-6	1110	0.593585	0.620984	0.615207	0.786546	0.838587	0.693266
D373	79	77	112.089	2,4-Heptadien-1-ol, (E,E)-	Alcohol	C7H12O	33467-79-7	1004	0.968263	0.9424	0.996247	0.540471	0.553916	0.479478
D200	124	95	124.052	Benzenemethanol, 3-hydroxy-	Alcohol	C7H8O2	620-24-6	1257	0.135056	0.125911	0.119272	0.119031	0.140124	0.108059
D306	85	41	154.136	1,5-Heptadien-4-ol, 3,3,6-trimethyl-	Terpenoids	C10H18O	27644-04-8	1084	1.63925	1.87805	1.7082	1.57389	1.73079	1.40862
KMW0098	67	41	100.089	3-Hexen-1-ol, (Z)-	Alcohol	C6H12O	928-96-1	858	0.868652	0.891872	0.981055	0.8561	0.910341	0.76528
XMW0239	57	85	184.219	Decane, 3-ethyl-3-methyl-	Hydrocarbons	C13H28	17312-66-2	1229	0.0834719	0.077883	0.0801213	0.0361105	0.0292558	0.0413798
D366	140	55	140.12	3-Octen-2-one, 7-methyl-	Ketone	C9H16O	33046-81-0	1113	0.0695736	0.0733676	0.0683883	0.0869312	0.0935199	0.0781877
w43	42	55	114.068	2-Oxepanone	Ester	C6H10O2	502-44-3	1065	0.138339	0.149405	0.137859	0.112585	0.126157	0.101807
XMW0909	80	79	150.104	2,6,6-Trimethylbicyclo[3.2.0]hept-2-en-7-one	Ketone	C10H14O	4613-37-0	1108	4.63836	4.97986	4.73485	7.2151	7.28596	6.54744
XMW0713	82	110	110.073	2-Cyclohexen-1-one, 3-methyl-	Ketone	C7H10O	1193-18-6	1075	7.48092	8.31816	7.83761	7.29396	8.08652	6.6427
XMW0299	71	43	144.115	Butanoic acid, butyl ester	Ester	C8H16O2	109-21-7	995	0	0	0	0.0362113	0.0378243	0.0329844
KMW0377	57	82	184.146	cis-3-Hexenyl-.alpha.-methylbutyrate	Ester	C11H20O2	53398-85-9	1234	0.142823	0.162159	0.138899	0.0195719	0.0278733	0.0208229
XMW0412	123	138	138.068	3-Acetyl-2,5-dimethyl furan	Heterocyclic compound	C8H10O2	10599-70-9	1099	0.170089	0.170327	0.20905	0.18159	0.188871	0.167389
D316	136	79	136.125	Adamantane	Hydrocarbons	C10H16	281-23-2	1116	0.984659	1.08009	1.01299	1.47377	1.50622	1.36439
XMW0603	121	136	136.089	Benzene, 1-ethyl-4-methoxy-	Aromatics	C9H12O	1515-95-3	1110	3.1334	3.53136	3.19053	4.86172	4.95821	4.51544
XMW0267	84	56	113.12	2-Ethylpiperidine	Heterocyclic compound	C7H15N	1484-80-6	1026	0.077572	0.0752983	0.0801277	0.0333112	0.0328714	0.0312097
KMW0366	82	67	170.131	Butanoic acid, 3-hexenyl ester, (Z)-	Ester	C10H18O2	16491-36-4	1187	0.676137	0.714318	0.675324	0.177554	0.171228	0.168401
NMW0040	134	91	134.073	Benzyl methyl ketone	Ketone	C9H10O	103-79-7	1124	0.154709	0.150604	0.131808	0.347573	0.39363	0.325472
XMW0531	55	69	152.12	Bicyclo[3.1.1]heptan-3-one, 2,6,6-trimethyl-, (1.alpha.,2.beta.,5.alpha.)-	Terpenoids	C10H16O	15358-88-0	1173	0.137204	0.12013	0.125705	0.116011	0.128961	0.108305
D456	55	67	184.183	8-Dodecen-1-ol, (Z)-	Alcohol	C12H24O	40642-40-8	1468	0	0	0	0.285143	0.268179	0.250305
KMW0276	56	55	130.136	1-Octanol	Alcohol	C8H18O	111-87-5	1072	0.0730869	0.0740062	0.0671632	0.0660797	0.0658578	0.0621281
KMW0539	83	55	112.052	2(5H)-Furanone, 5-ethyl-	Heterocyclic compound	C6H8O2	2407-43-4	966	0.285063	0.281576	0.246231	0.247521	0.279082	0.231925
KMW0097	114	113	114.014	2-Methyl-3-furanthiol	Heterocyclic compound	C5H6OS	28588-74-1	870	2.25097	1.53889	2.43578	1.49886	1.32967	2.10596
XMW1392	91	105	148.125	2-Methyl-7-exo-vinylbicyclo[4.2.0]oct-1(2)-ene	Hydrocarbons	C11H16	107914-89-6	1112	1.50641	1.72035	1.68509	2.26748	2.20134	2.16221
KMW0088	98	83	98.073	2-Hexenal, (E)-	Aldehyde	C6H10O	6728-26-3	854	1.23502	5.93501	14.4556	5.76608	6.48693	5.45356
NMW0057	42	113	113.048	Glutarimide	Amine	C5H7NO2	1121-89-7	1154	0.197373	0.190147	0.176065	0.183183	0.216114	0.176383
XMW0586	126	57	184.219	Dodecane, 5-methyl-	Hydrocarbons	C13H28	17453-93-9	1255	0.195416	0.163485	0.1648	0.154722	0.178345	0.148365
XMW0373	85	57	170.203	Undecane, 2-methyl-	Hydrocarbons	C12H26	7045-71-8	1164	0.194942	0.218177	0.168174	0.135468	0.216113	0.175651
XMW0422	57	71	198.235	3,5-Dimethyldodecane	Hydrocarbons	C14H30	107770-99-0	1285	0.0313756	0.0247471	0.0328718	0.0156128	0.0220411	0.0271148
KMW0374	69	41	154.136	4-Hexen-1-ol, 5-methyl-2-(1-methylethenyl)-, (R)-	Terpenoids	C10H18O	498-16-8	1170	0.592735	0.579695	0.540214	0.556858	0.611976	0.537837
KMW0392	71	81	156.151	Cyclohexanol, 5-methyl-2-(1-methylethyl)-, (1.alpha.,2.alpha.,5.alpha.)-	Terpenoids	C10H20O	491-02-1	1187	0.458322	0.48046	0.429714	0.123264	0.134053	0.119097
XMW0670	94	68	95.048	Acetonitrile, 2,2'-iminobis-	Nitrogen compounds	C4H5N3	628-87-5	1108	1.6776	1.84868	1.69032	2.17656	2.10481	2.17866
KMW0254	83	55	152.12	1,5-Heptadien-4-one, 3,3,6-trimethyl-	Terpenoids	C10H16O	546-49-6	1062	0.512379	0.499133	0.468665	0.424269	0.480813	0.415229
XMW1069	67	82	170.131	Butanoic acid, 3-hexenyl ester, (E)-	Ester	C10H18O2	53398-84-8	1185	0.695852	0.755944	0.701071	0.204003	0.204465	0.204628
KMW0458	136	121	196.146	p-Menth-8-en-3-ol, acetate	Ester	C12H20O2	89-49-6	1259	0.0892808	0.0891313	0.0884471	0.080296	0.0944246	0.080493
WMW0196	55	41	168.115	Lilac Aldehyde C	Aldehyde	C10H16O2	53447-48-6	1167	0.137204	0.12013	0.125705	0.106821	0.128961	0.108305
XMW0445	68	97	126.068	6-Ethyl-5,6-dihydro-2H-pyran-2-one	Heterocyclic compound	C7H10O2	19895-35-3	1160	0.608378	0.587878	0.511831	0.546558	0.614494	0.544449
XMW1310	85	57	158.131	Isobutyl isovalerate	Ester	C9H18O2	589-59-3	1005	0.0289789	0.0313442	0.0300163	0.0145565	0.0299294	0.0244298
XMW1209	71	70	158.131	Propanoic acid, 2-methyl-, 2-methylbutyl ester	Ester	C9H18O2	2445-69-4	1016	0.106304	0.086718	0.114323	0.041628	0.0925927	0.0460967
D427	81	82	166.136	2-n-Heptylfuran	Heterocyclic compound	C11H18O	3777-71-7	1195	0.0577782	0.0591266	0.0600967	0.0196183	0.0198539	0.0202748
D311	109	81	152.12	3-p-Menthen-7-al	Aldehyde	C10H16O	27841-22-1	1169	0.238727	0.114047	0.104643	0.113879	0.129046	0.116205
KMW0362	95	41	154.136	Isoborneol	Terpenoids	C10H18O	124-76-5	1157	3.69626	3.52706	3.4105	3.46201	4.03723	3.57263
XMW1072	93	81	154.136	(E)-2,6-Dimethylocta-5,7-dien-2-ol	Alcohol	C10H18O	7643-60-9	1169	0.9765	0.937967	0.910356	0.904963	1.05137	0.933991
NMW0059	94	67	94.053	4-Aminopyridine	Heterocyclic compound	C5H6N2	504-24-5	1158	0.807587	0.789237	0.745398	0.752448	0.868259	0.776202
XMW0358	110	95	152.084	1-Pentanone, 1-(2-furanyl)-	Heterocyclic compound	C9H12O2	3194-17-0	1176	0.586424	0.574497	0.534277	0.479507	0.553056	0.494991
XMW1217	109	124	166.099	3-Methyl-1-(3-methyl-2-furyl)-1-butanone	Heterocyclic compound	C10H14O2	488-05-1	1201	0.0395615	0.0409552	0.0570762	0.0378383	0.0454855	0.0396193
NMW0115	148	147	148.089	Anethole	Aromatics	C10H12O	104-46-1	1287	0	0	0	0.102607	0.15286	0.122237
GMW0087	83	41	154.136	(E)-2-Decenal	Aldehyde	C10H18O	3913-81-3	1263	0.11595	0.0975322	0.0926516	0.214501	0.200113	0.25726
KMW0338	83	55	140.12	2-Nonenal, (E)-	Aldehyde	C9H16O	18829-56-6	1162	1.27374	1.23022	1.15693	1.19458	1.37586	1.24928
XMW0790	105	119	162.141	6,7-Dimethyl-1,2,3,5,8,8a-hexahydronaphthalene	Aromatics	C12H18	107914-92-1	1273	0	0	0	0.0346752	0.0400233	0.036373
WMW0222	41	55	168.188	1-Dodecene	Hydrocarbons	C12H24	112-41-4	1190	0.408249	0.404364	0.385773	0.273664	0.35361	0.303808
XMW0238	85	57	184.219	Undecane, 4,4-dimethyl-	Hydrocarbons	C13H28	17312-68-4	1229	0.0491736	0.0465063	0.0492136	0.0290456	0.0289284	0.0317654
NMW0145	77	105	121.053	Benzamide	Amine	C7H7NO	55-21-0	1344	0.257482	0.216951	0.215376	0.215262	0.299675	0.258694
KMW0345	41	70	138.104	2,6-Nonadienal, (E,Z)-	Aldehyde	C9H14O	557-48-2	1155	0.123819	0.119448	0.11671	0.107429	0.13033	0.116139
KMW0354	41	69	140.12	2,6-Nonadien-1-ol	Alcohol	C9H16O	7786-44-9	1167	0.123819	0.119448	0.11671	0.107429	0.13033	0.116139
XMW1234	99	57	144.053	(2E)-2-(Acetylhydrazono)propanoic acid	Acid	C5H8N2O3	64096-81-7	1468	0	0	0	0.0168425	0.0173095	0.0222751
KMW0380	124	94	166.111	Pyrazine, 2-methoxy-3-(2-methylpropyl)-	Heterocyclic compound	C9H14N2O	24683-00-9	1181	23.5297	22.6848	22.1756	17.8704	20.3907	19.035
WMW0083	57	41	156.151	2-Decen-1-ol, (E)-	Alcohol	C10H20O	18409-18-2	1257	0.194241	0.190387	0.202376	0.142007	0.175374	0.156525
D269	57	85	158.131	Butanoic acid, 2-methyl-, 2-methylpropyl ester	Ester	C9H18O2	2445-67-2	1004	0.10782	0.0911395	0.0922743	0.0592629	0.130637	0.0943223
KMW0383	97	57	142.063	2(5H)-Furanone, 5-ethyl-3-hydroxy-4-methyl-	Heterocyclic compound	C7H10O3	698-10-2	1195	0	0	0	1.31493	1.94328	1.81799
WMW0104	69	55	142.136	Cyclooctanemethanol	Alcohol	C9H18O	3637-63-6	1073	0.0678044	0.0405843	0.0412564	0.0858544	0.0857776	0.102193
XMW1240	99	70	186.162	Hexanoic acid, 2-methylbutyl ester	Ester	C11H22O2	2601-13-0	1247	0.147863	0.124034	0.12015	0.0909288	0.0999508	0.100381
D329	79	81	152.12	Myroxide	Terpenoids	C10H16O	28977-57-3	1141	0	0	0	0.297888	0.31569	1.39372
WMW0041	41	55	152.12	Isopinocarveol	Terpenoids	C10H16O	6712-79-4	1178	0.0646327	0.0715739	0.0693919	0.0186689	0.0198478	0.149558
XMW0100	71	57	156.188	Octane, 5-ethyl-2-methyl-	Hydrocarbons	C11H24	62016-18-6	986	0.0406332	0.0291363	0.0484501	0.0228238	0.02313	0.029983
XMW0026	60	73	130.099	Heptanoic Acid	Acid	C7H14O2	111-14-8	1080	0	0	0	0.0216486	0.0304157	0.0277802
XMW1138	69	41	154.136	6-Octen-1-ol, 7-methyl-3-methylene-	Terpenoids	C10H18O	13066-51-8	1195	2.29384	2.25916	2.17174	1.32419	1.48653	1.97824
D417	82	67	142.099	3-Hexen-1-ol, acetate, (E)-	Ester	C8H14O2	3681-82-1	1005	23.8503	22.7974	24.5957	8.47015	8.94539	9.84258
WMW0103	67	68	114.104	2-Cyclopentylethanol	Alcohol	C7H14O	766-00-7	1003	38.5446	37.07	39.6376	13.3925	14.1731	15.8935
NMW0010	66	39	132.094	Dicyclopentadiene	Hydrocarbons	C10H12	77-73-6	1003	1.03959	0.991761	1.07646	0.336517	0.361122	0.402315
XMW0228	83	70	126.104	Cyclohexanol, 1-ethenyl-	Alcohol	C8H14O	1940-19-8	1020	1.79505	1.73977	1.87808	0.625313	0.675921	0.748565
XMW1208	42	41	70.028	1H-Tetrazole	Heterocyclic compound	CH2N4	288-94-8	1019	1.1942	1.22275	1.29866	0.390016	0.421811	0.475611
KMW0176	108	111	126.104	5-Hepten-2-one, 6-methyl-	Ketone	C8H14O	110-93-0	986	0.184783	0.168841	0.164649	0.363875	0.404751	0.204101
KMW0489	68	79	150.104	1-Cyclohexene-1-carboxAldehyde, 4-(1-methylethenyl)-, (S)-	Aldehyde	C10H14O	18031-40-8	1207	1.87864	1.83641	1.76943	1.04258	1.18954	1.50094
D348	68	67	154.136	Cyclobutaneethanol, 1-methyl-2-(1-methylethenyl)-, cis-	Alcohol	C10H18O	30820-22-5	1183	1.87864	1.83641	1.76943	1.04258	1.18954	1.50094
KMW0158	77	106	106.042	BenzAldehyde	Aldehyde	C7H6O	100-52-7	960	0.328095	0.255848	0.283812	0.231905	0.261142	0.319908
KMW0642	57	71	226.266	Hexadecane	Hydrocarbons	C16H34	544-76-3	1600	0.0322867	0.030993	0.0508939	0.0301867	0.0372479	0.0366087
D358	57	82	198.162	4-tert-Butylcyclohexyl acetate	Ester	C12H22O2	32210-23-4	1368	0	0	0	0.0476001	0.106811	0.0648184
XMW0122	83	55	154.136	Cyclohexanol, 2-methyl-3-(1-methylethenyl)-, (1.alpha.,2.alpha.,3.alpha.)-	Alcohol	C10H18O	54244-81-4	1196	0.0390677	0.0310953	0.0269694	0.0295595	0.1539	0.0401196
XMW0637	70	42	112.089	Cyclobutanone, 2,2,3-trimethyl-	Ketone	C7H12O	1449-49-6	847	3.40494	4.07706	3.68706	3.78106	4.30814	3.9942
WMW0187	45	69	102.104	2-Hexanol	Alcohol	C6H14O	626-93-7	801	0.60165	0.581555	0.615493	0.541112	0.600869	0.579433
XMW0276	83	55	112.089	4-Hexen-3-one, 5-methyl-	Ketone	C7H12O	13905-10-7	1080	0.141014	0.121561	0.127049	0.196253	0.221519	0.199861
WMW0059	105	77	204.115	E-2-Hexenyl benzoate	Ester	C13H16O2	76841-70-8	1588	0.0503466	0.0478751	0.049985	0.0763131	0.0833386	0.0832552
w05	69	41	220.183	2,6,10-Dodecatrienal, 3,7,11-trimethyl-	Terpenoids	C15H24O	19317-11-4	1656	0.0499997	0.0696246	0.0658439	0.100103	0.113623	0.104451
KMW0736	151	166	166.063	Apocynin	Ketone	C9H10O3	498-02-2	1487	0.159649	0.111801	0.129106	0.13229	0.149009	0.135927
WMW0087	71	43	158.131	Butanoic Acid, 3-methylbutyl ester	Ester	C9H18O2	106-27-4	1056	0.0970821	0.0540459	0.102932	0.0451764	0.0412572	0.0641365
KMW0199	41	93	136.125	.beta.-Myrcene	Terpenoids	C10H16	123-35-3	991	3.42352	2.86435	2.57529	9.39022	10.4137	9.54371
KMW0603	161	105	204.188	Germacrene D	Terpenoids	C15H24	23986-74-5	1481	0.281632	0.206975	0.222588	0.238512	0.270474	0.236484
D405	45	91	136.089	Benzene, (2-methoxyethyl)-	Aromatics	C9H12O	3558-60-9	1086	0.0285196	0.0319401	0.0384125	0.0589272	0.0576057	0.0531694
WMW0092	44	58	143.167	1-OctanAmine,N-methyl-	Amine	C9H21N	2439-54-5	1088	0.0289058	0.0300267	0.0260418	0.0433265	0.0437042	0.0421408
NMW0072	93	41	154.136	(1.alpha.,2.beta.,5.alpha.)-2-methyl-5-(1-methylethenyl)-Cyclohexanol	Terpenoids	C10H18O	38049-26-2	1192	0.926512	1.04833	1.13897	1.11337	1.10012	1.12097
