# Supplementary material for: Aviation Mutagenesis Alters the Content of Volatile Compounds in Dahongpao (Camellia sinensis) Leaves and Improves Tea Quality
Source: Foods. 2024 Mar 20;13(6):946. doi: 10.3390/foods13060946 (PMC10969991; doi:10.3390/foods13060946)
Supplement: Supplementary file 1 [file foods-13-00946-s001.zip › Table+S2+Raw+data+of+gross+tea.xlsx]

## Sheet: Table S2
Index	Quantitative ion	Qualitative ion	Molecular weight (Da)	Compounds	Class I	Formula	CAS	NIST20 RI	FCK-1 (mAU*min)	FCK-2 (mAU*min)	FCK-3 (mAU*min)	FTM-1 (mAU*min)	FTM-2 (mAU*min)	FTM-3 (mAU*min)
WMW0216	81	43	196.146	Fenchyl acetate	Ester	C12H20O2	13851-11-1	1224	0.258706	0.219028	0.189852	0	0	0
XMW1102	131	103	174.068	Vinyl trans-cinnamate	Ester	C11H10O2	17719-70-9	1357	0.208721	0.196768	0.150234	0	0	0
D216	121	93	206.167	.alpha.-Irone	Terpenoids	C14H22O	79-69-6	1526	0.0756136	0.0736724	0.0648649	0	0	0
XMW0049	137	109	208.183	2,4,4-Trimethyl-3-(3-methylbutyl)cyclohex-2-enone	Ketone	C14H24O	88725-82-0	1520	0.343733	0.544672	0.387402	0	0	0
KMW0686	131	103	176.084	2-Propenoic acid, 3-phenyl-, ethyl ester, (E)-	Ester	C11H12O2	4192-77-2	1463	2.9043	3.07345	2.41271	0	0	0
KMW0540	164	103	164.084	Eugenol	Phenol	C10H12O2	97-53-0	1358	0.685819	0.712144	0.597518	0	0	0
w14	57	71	242.261	Octane, 1,1'-oxybis-	Hydrocarbons	C16H34O	629-82-3	1688	0.0396831	0.0482637	0.0371197	0	0	0
XMW1324	117	146	146.073	BenzeneacetAldehyde, .alpha.-ethylidene-	Aldehyde	C10H10O	4411-89-6	1276	0.0975753	0.126294	0.127039	0	0	0
KMW0313	112	41	154.136	Cyclohexanone, 5-methyl-2-(1-methylethyl)-, trans-	Terpenoids	C10H18O	89-80-5	1154	0.0503782	0.0903672	0.126476	0.138798	0.0275336	0.0276487
NMW0181	156	141	156.094	Naphthalene, 1,6-dimethyl-	Aromatics	C12H12	575-43-9	1422	0.0523656	0.0765291	0.0604347	0.0781938	0.0621333	0.0198915
WMW0177	121	136	210.162	3-Cyclohexene-1-methanol, .alpha.,.alpha.,4-trimethyl-, propanoate	Terpenoids	C13H22O2	80-27-3	1432	0.177957	0.215547	0.172158	0.182474	0.177447	0.255333
D171	133	190	190.136	3-(4-Isopropylphenyl)-2-methylpropionAldehyde	Aldehyde	C13H18O	103-95-7	1464	0	0	0	1.33459	1.72958	1.76509
XMW1165	161	119	204.188	1-Isopropyl-4,7-dimethyl-1,2,3,5,6,8a-hexahydronaphthalene	Terpenoids	C15H24	16729-01-4	1469	0.198395	0.276613	0.158294	0.348241	0.49097	0.417727
KMW0487	92	91	134.073	2-Propen-1-ol, 3-phenyl-	Alcohol	C9H10O	104-54-1	1310	0.0747592	0.0779781	0.0695225	0.116665	0.115123	0.135166
XMW0230	57	71	268.313	Pentadecane, 2,6,10,14-tetramethyl-	Hydrocarbons	C19H40	1921-70-6	1690	0.0407268	0.0482637	0.0419332	0.0757678	0.0554986	0.0416126
D300	105	189	204.188	Aristolochene	Terpenoids	C15H24	26620-71-3	1487	0.746553	0.674576	0.763995	1.27708	1.38078	1.46907
D376	135	39	150.104	(Z)-2,6-Dimethylocta-2,5,7-trien-4-one	Ketone	C10H14O	33746-71-3	1231	0.122651	0.137334	0.117954	0.0862274	0.0982849	0.0993471
XMW0182	133	91	204.188	(3S,3aS,6R,8aS)-3,8,8-Trimethyl-7-methyleneoctahydro-1H-3a,6-methanoazulene	Terpenoids	C15H24	31145-21-8	1444	2.13061	1.52991	2.08784	1.80597	2.01939	2.06536
XMW0549	108	91	204.188	(1S,4aR,7R)-1,4a-Dimethyl-7-(prop-1-en-2-yl)-1,2,3,4,4a,5,6,7-octahydronaphthalene	Terpenoids	C15H24	52026-55-8	1447	0.220392	0.187618	0.160807	0.0817994	0.0853961	0.0926234
XMW1490	162	161	162.068	3-MethoxycinnamAldehyde	Aldehyde	C10H10O2	56578-36-0	1451	0.200531	0.153088	0.135616	0.130004	0.167889	0.133199
XMW0009	161	189	204.188	Naphthalene, 1,2,4a,5,8,8a-hexahydro-4,7-dimethyl-1-(1-methylethyl)-, [1S-(1.alpha.,4a.beta.,8a.alpha.)]-	Terpenoids	C15H24	523-47-7	1518	0.13956	0.2463	0.145321	0.54975	0.335326	0.306062
XMW1087	99	71	158.058	2(3H)-Furanone, 5-(acetyloxy)dihydro-5-methyl-	Heterocyclic compound	C7H10O4	57681-51-3	1226	0.195753	0.248252	0.192472	0.188005	0.120794	0.0997304
XMW0012	105	161	204.188	Naphthalene, 1,2,4a,5,6,8a-hexahydro-4,7-dimethyl-1-(1-methylethyl)-, [1S-(1.alpha.,4a.beta.,8a.alpha.)]-	Terpenoids	C15H24	24406-05-1	1538	0.0945101	0.0677543	0.104159	0.17573	0.198162	0.176126
D314	67	82	226.193	8-Dodecen-1-ol, acetate, (Z)-	Ester	C14H26O2	28079-04-1	1605	0.0676936	0.0534428	0.0510274	0.0922094	0.0581719	0.0574036
KMW0429	95	93	182.131	Isobornyl formate	Ester	C11H18O2	1200-67-5	1233	0.0940799	0.118264	0.112032	0.0911212	0.0749432	0.086224
XMW0469	105	119	204.188	(1R,3aS,8aS)-7-Isopropyl-1,4-dimethyl-1,2,3,3a,6,8a-hexahydroazulene	Terpenoids	C15H24	36577-33-0	1440	0.803716	0.547286	0.497903	0.481927	0.501212	0.492002
KMW0638	69	41	238.193	Geranyl isovalerate	Ester	C15H26O2	109-20-6	1606	0.0649583	0.0614269	0.0616814	0.131908	0.122024	0.131428
KMW0563	69	41	194.167	5,9-Undecadien-2-one, 6,10-dimethyl-, (E)-	Ketone	C13H22O	3796-70-1	1453	3.33379	2.45925	3.01816	3.95314	3.90836	3.96966
XMW0711	121	93	121.053	Formamide, N-phenyl-	Amine	C7H7NO	103-70-8	1221	0.122753	0.131673	0.0849626	0.081119	0.0910467	0.0790461
XMW0424	95	41	166.136	2,6-Dimethyl-1-nonen-3-yn-5-ol	Alcohol	C11H18O	19780-98-4	1300	0.116072	0.143664	0.111619	0.181527	0.173731	0.180758
XMW0214	109	81	168.115	1(2H)-Naphthalenone, octahydro-4-hydroxy-, trans-	Ketone	C10H16O2	21766-50-7	1461	0.597498	0.475976	0.340793	0.459443	0.45798	0.458147
KMW0493	135	150	150.068	2-Methoxy-4-vinylphenol	Aromatics	C9H10O2	7786-61-0	1316	0.0379443	0.036093	0.0776187	0.116588	0.130469	0.111967
XMW0926	133	105	148.089	Ethanone, 1-(2,4-dimethylphenyl)-	Ketone	C10H12O	89-74-7	1253	0.0761615	0.0805052	0.0751878	0.0676581	0.0447331	0.0408956
WMW0061	133	134	134.073	BenzAldehyde, 2-ethyl-	Aldehyde	C9H10O	22927-13-5	1176	0.208627	0.192852	0.198572	0.0938381	0.105815	0.0875875
XMW0767	111	93	156.115	2-Furanmethanol, 5-ethenyltetrahydro-.alpha.,5-dimethyl-	Heterocyclic compound	C9H16O2	104188-13-8	1066	1.16575	1.54266	1.47333	1.80021	1.48401	1.66323
KMW0478	41	69	204.188	cis-.beta.-Farnesene	Terpenoids	C15H24	28973-97-9	1444	1.08356	0.805481	0.82648	1.01204	1.02223	1.00097
KMW0595	119	93	204.188	1,3-Cyclohexadiene, 5-(1,5-dimethyl-4-hexenyl)-2-methyl-, [S-(R*,S*)]-	Terpenoids	C15H24	495-60-3	1495	2.61774	2.28026	2.75603	5.47376	4.92438	5.25146
KMW0578	93	80	238.193	Butanoic acid, 3-methyl-, 1-ethenyl-1,5-dimethyl-4-hexenyl ester	Ester	C15H26O2	1118-27-0	1464	3.48814	2.47733	2.4555	3.11409	2.97183	3.02382
D422	69	55	172.183	Undecanol-5	Alcohol	C11H24O	37493-70-2	1288	0.312288	0.31888	0.289784	0.691465	0.61968	0.41753
XMW0700	189	133	204.188	4a,8-Dimethyl-2-(prop-1-en-2-yl)-1,2,3,4,4a,5,6,7-octahydronaphthalene	Terpenoids	C15H24	103827-22-1	1492	0.0602477	0.0669776	0.0577314	0.134493	0.126055	0.129875
XMW0097	93	41	190.172	1,5-Cycloundecadiene, 8,8-dimethyl-9-methylene-	Hydrocarbons	C14H22	62338-54-9	1485	2.39218	2.13276	2.436	4.92301	4.35309	4.65743
XMW0825	119	93	204.188	Bicyclo[3.1.1]heptane, 6-methyl-2-methylene-6-(4-methyl-3-pentenyl)-, [1R-(1.alpha.,5.alpha.,6.beta.)]-	Terpenoids	C15H24	55123-21-2	1446	0.720005	0.503596	0.569393	0.528113	0.506697	0.512642
WMW0003	107	161	204.188	Eremophilene	Terpenoids	C15H24	10219-75-7	1494	0.983873	0.847349	1.0227	2.07126	1.85092	1.96612
NMW0206	91	105	204.188	(1R,9R,E)-4,11,11-Trimethyl-8-methylenebicyclo[7.2.0]undec-4-ene	Terpenoids	C15H24	68832-35-9	1466	3.4284	3.20813	2.9388	1.10221	1.05099	1.06739
KMW0483	41	57	170.167	Undecanal	Aldehyde	C11H22O	112-44-7	1307	0.410463	0.456198	0.40826	0.45761	0.418661	0.437609
D341	81	41	204.188	Naphthalene, decahydro-1,6-bis(methylene)-4-(1-methylethyl)-, (4.alpha.,4a.alpha.,8a.alpha.)-	Terpenoids	C15H24	30021-46-6	1459	1.09988	0.829231	0.920301	0.906762	0.891003	0.879792
XMW0916	91	92	226.036	(5-bromopentyl)-Benzene	Aromatics	C11H15Br	14469-83-1	1487	1.07131	0.962496	1.04849	2.08613	1.87432	1.97879
XMW0817	69	93	204.188	(1S,5S,6R)-6-Methyl-2-methylene-6-(4-methylpent-3-en-1-yl)bicyclo[3.1.1]heptane	Terpenoids	C15H24	15438-94-5	1492	0.72402	0.648253	0.70027	1.3796	1.24105	1.30839
XMW0212	151	95	151.063	1,4 Benzodioxan-6-amine	Heterocyclic compound	C8H9NO2	22013-33-8	1456	0.225797	0.250914	0.209515	0.186636	0.174238	0.178768
KMW0582	161	105	204.188	.beta.-Guaiene	Terpenoids	C15H24	88-84-6	1490	0.118337	0.130155	0.123383	0.269546	0.245472	0.254773
NMW0027	91	119	120.058	BenzAldehyde, 3-methyl-	Aldehyde	C8H8O	620-23-5	1071	0.29332	0.38717	0.36927	0.233803	0.256712	0.195032
XMW1065	71	43	156.188	Octane, 2,6,6-trimethyl-	Hydrocarbons	C11H24	54166-32-4	966	0.0758318	0.10335	0.0965904	0.075715	0.0830117	0.0648175
D265	97	41	181.183	Dodecanenitrile	Nitrogen compounds	C12H23N	2437-25-4	1490	0.0731496	0.0793305	0.0805143	0.207823	0.205222	0.198632
XMW0054	41	119	220.183	Farnesene epoxide, E-	Terpenoids	C15H24O	83637-40-5	1624	0.066216	0.0569398	0.0601085	0.150749	0.140096	0.14241
XMW0776	105	77	162.068	Benzoic acid, 2-propenyl ester	Ester	C10H10O2	583-04-0	1254	0.424511	0.394477	0.40175	0.568082	0.5234	0.53477
XMW1089	99	41	184.146	Hexanoic acid, cyclopentyl ester	Ester	C11H20O2	5413-59-2	1325	0.0845132	0.0752129	0.0603973	0.0940035	0.0902838	0.0892313
NMW0209	55	41	184.146	Undecylenic Acid	Acid	C11H20O2	112-38-9	1484	0.412207	0.354397	0.466599	0.86233	0.763397	0.798436
XMW0022	95	109	168.115	Iridomyrmecin	Terpenoids	C10H16O2	485-43-8	1463	0.335047	0.278706	0.238946	0.291595	0.278753	0.274558
NMW0041	69	41	150.141	(E)-4,8-Dimethylnona-1,3,7-triene	Terpenoids	C11H18	19945-61-0	1116	12.8479	18.382	16.4998	11.3894	11.8553	10.5866
KMW0556	41	105	204.188	Naphthalene, decahydro-4a-methyl-1-methylene-7-(1-methylethenyl)-, [4aR-(4a.alpha.,7.alpha.,8a.beta.)]-	Terpenoids	C15H24	17066-67-0	1486	0.347715	0.301885	0.434546	0.732639	0.66568	0.680023
KMW0437	104	91	164.084	Acetic acid, 2-phenylethyl ester	Ester	C10H12O2	103-45-7	1260	3.24103	3.08379	3.0814	4.68497	4.41048	4.3788
KMW0500	108	91	178.099	Butanoic acid, phenylmethyl ester	Ester	C11H14O2	103-37-7	1347	0.442296	0.51997	0.42054	0.645453	0.634742	0.603936
XMW1260	123	93	196.183	1-Cyclohexene-1-propanol, .alpha.,2,6,6-tetramethyl-	Alcohol	C13H24O	3293-47-8	1452	0.0769595	0.0637433	0.0636265	0.0741099	0.0684367	0.0687522
D428	119	91	220.183	6-Methyl-2-(4-methylcyclohex-3-en-1-yl)hepta-1,5-dien-4-ol	Terpenoids	C15H24O	38142-56-2	1608	0.0928474	0.0801023	0.0918013	0.245898	0.216974	0.224568
XMW1439	91	119	165.079	Benzene, (1-nitropropyl)-	Aromatics	C9H11NO2	5279-14-1	1310	0.383979	0.475913	0.41631	0.700979	0.678313	0.654052
D206	55	112	112.052	1,2-Cyclohexanedione	Ketone	C6H8O2	765-87-7	1062	0.113884	0.132211	0.140957	0.180912	0.177724	0.168729
XMW0462	164	79	164.12	2-Cyclopenten-1-one, 3-methyl-2-(2-pentenyl)-, (Z)-	Ketone	C11H16O	488-10-8	1395	2.22836	2.35991	2.16795	3.96158	3.92803	3.67751
KMW0361	134	133	134.073	BenzAldehyde, 4-ethyl-	Aldehyde	C9H10O	4748-78-1	1180	0.183496	0.197845	0.176252	0.102433	0.0932275	0.093862
KMW0548	204	161	204.188	[1aR-(1a.alpha.,4.alpha.,4a.beta.,7b.alpha.)]-1a,2,3,4,4a,5,6,7b-octahydro-1,1,4,7-tetramethyl-1H-Cycloprop[e]azulene	Terpenoids	C15H24	489-40-7	1409	0.0337711	0.029547	0.0293124	0.0424017	0.0337033	0.036047
XMW0464	165	105	165.079	Benzoic acid, 2-(methylamino)-, methyl ester	Ester	C9H11NO2	85-91-6	1408	0.269807	0.312557	0.272104	0.478318	0.468395	0.438766
D99	164	132	179.095	Benzoic acid, 2-(dimethylamino)-, methyl ester	Ester	C10H13NO2	10072-05-6	1404	2.26139	2.63637	2.03213	4.02111	3.92803	3.67751
D384	87	73	151.979	TriSulfur compounds, methyl 2-propenyl	Sulfur compounds	C4H8S3	34135-85-8	1142	0.487794	0.549198	0.517489	0.484469	0.455826	0.440725
KMW0644	159	205	220.183	1H-Cycloprop[e]azulen-7-ol, decahydro-1,1,7-trimethyl-4-methylene-, [1ar-(1a.alpha.,4a.alpha.,7.beta.,7a.beta.,7b.alpha.)]-	Terpenoids	C15H24O	6750-60-3	1576	0.133262	0.193123	0.124348	0.218256	0.211852	0.198696
NMW0175	135	107	164.12	Phenol, 4-(1,1-dimethylpropyl)-	Phenol	C11H16O	80-46-6	1400	1.71256	2.04902	1.72485	3.07743	3.00675	2.79783
XMW0745	99	41	184.146	2(3H)-Furanone, 5-hexyldihydro-4-methyl-, trans-	Heterocyclic compound	C11H20O2	147254-33-9	1444	0.0742476	0.0817993	0.0540247	0.0834003	0.0764629	0.0752137
XMW0033	119	121	204.188	(1R,3aS,4aS,8aS)-1,4,4,6-Tetramethyl-1,2,3,3a,4,4a,7,8-octahydrocyclopenta[1,4]cyclobuta[1,2]benzene	Terpenoids	C15H24	94535-52-1	1403	0.155177	0.168343	0.130666	0.278856	0.281131	0.249292
D346	105	77	180.115	Methyl 6,6-dimethylbicyclo[3.1.1]hept-2-ene-2-carboxylate	Ester	C11H16O2	30649-97-9	1301	3.0736	3.15011	2.91614	5.66661	5.25308	5.08815
XMW0388	161	122	204.188	(4aR,8aR)-5,8a-dimethyl-3-propan-2-ylidene-1,2,4,4a,7,8-hexahydronaphthalene	Terpenoids	C15H24	6813-21-4	1542	0.0586792	0.0481525	0.0611977	0.139777	0.128938	0.125315
KMW0672	156	141	156.094	Naphthalene, 2,6-dimethyl-	Aromatics	C12H12	581-42-0	1407	0.182468	0.0935645	0.0682092	0.108046	0.103839	0.0970247
XMW0964	137	121	204.188	Petasitene	Terpenoids	C15H24	443124-67-2	1402	0.063646	0.0694953	0.0645424	0.113069	0.103584	0.100876
NMW0276	137	194	194.094	2-Butanone, 4-(4-hydroxy-3-methoxyphenyl)-	Ketone	C11H14O3	122-48-5	1648	0	0	0	0.14079	0.142196	0.123167
XMW0856	105	77	164.084	1-Butanone, 2-hydroxy-1-phenyl-	Ketone	C10H12O2	16183-46-3	1390	0.653417	0.832762	0.601239	1.39587	1.34307	1.24436
XMW0017	74	87	270.256	Hexadecanoic acid, methyl ester	Ester	C17H34O2	112-39-0	1926	0.398345	0.368668	0.213418	0.501585	0.482587	0.446698
D284	104	57	206.131	Butanoic acid, 2-methyl-, 2-phenylethyl ester	Ester	C13H18O2	24817-51-4	1488	0.316004	0.304299	0.284161	0.452162	0.398764	0.396431
WMW0081	107	136	136.089	cis-2-(2-Pentenyl)furan	Heterocyclic compound	C9H12O	70424-13-4	1002	0.10109	0.139977	0.123743	0.0780595	0.056494	0.0534365
KMW0320	83	55	156.115	Cyclohexanecarboxylic acid, ethyl ester	Ester	C9H16O2	3289-28-9	1136	0.106509	0.120368	0.113069	0.207371	0.191062	0.18285
XMW1336	91	92	207.09	N-Benzyloxy-2-carbomethoxyaziridine	Heterocyclic compound	C11H13NO3	53084-33-6	1550	0.337126	0.32783	0.313303	0.782094	0.718509	0.687845
XMW0195	41	67	206.203	1H-Cycloprop[e]azulene, decahydro-1,1,4,7-tetramethyl-, [1aR-(1a.alpha.,4.beta.,4a.beta.,7.beta.,7a.beta.,7b.alpha.)]-	Terpenoids	C15H26	28580-43-0	1373	2.62141	4.94501	4.55792	5.55213	5.36576	4.87151
D125	91	136	192.115	Benzeneacetic acid, 2-methylpropyl ester	Ester	C12H16O2	102-13-6	1393	1.7279	1.907	1.67011	3.0962	3.00535	2.71096
WMW0052	93	107	204.188	(E)-1-Methyl-4-(6-methylhept-5-en-2-ylidene)cyclohex-1-ene	Terpenoids	C15H24	53585-13-0	1533	0.49736	0.349165	0.467601	0.869589	0.821531	0.763734
XMW1096	54	71	198.162	Butanoic acid, 1-ethenylhexyl ester	Ester	C12H22O2	16491-54-6	1307	0	0	0	0.102049	0.0981882	0.0892773
XMW0719	91	134	134.11	p-Mentha-1,5,8-triene	Terpenoids	C10H14	21195-59-5	1111	0.788494	1.0431	0.928732	0.711788	0.656869	0.623588
w11	69	81	192.151	3,5,9-Undecatrien-2-one, 6,10-dimethyl-, (E,Z)-	Ketone	C13H20O	13927-47-4	1535	0.206857	0.259157	0.251123	0.50964	0.473936	0.446167
NMW0171	77	107	152.047	Acetic Acid, phenoxy-	Acid	C8H8O3	122-59-8	1389	1.18465	1.31511	0.978034	2.13098	2.05416	1.85634
D226	58	59	184.183	2-Dodecanone	Ketone	C12H24O	6175-49-1	1396	0.51219	0.639785	0.540838	0.480465	0.461403	0.416473
XMW1226	99	56	172.146	Hexanoic acid, 2-methylpropyl ester	Ester	C10H20O2	105-79-3	1149	0.0310254	0.125932	0.124733	0.118124	0.112393	0.102396
KMW0293	81	39	124.089	2,4-Octadienal, (E,E)-	Aldehyde	C8H12O	30361-28-5	1115	2.95293	3.95383	3.46147	2.64832	2.47481	2.29743
XMW0689	150	107	150.079	Ethanone, 1-(3,5-dimethylpyrazinyl)-	Heterocyclic compound	C8H10N2O	54300-08-2	1174	0.0956518	0.0897821	0.0867967	0.0735773	0.0636558	0.062588
D222	68	99	184.146	Hexanoic acid, 3-methyl-2-butenyl ester	Ester	C11H20O2	76649-22-4	1284	0.309052	0.325292	0.280161	0.488364	0.465405	0.421631
XMW0372	57	41	212.25	Tridecane, 4,8-dimethyl-	Hydrocarbons	C15H32	55030-62-1	1384	1.27355	1.59186	1.24453	4.54583	4.34641	3.918
D353	161	91	204.188	(S,1Z,6Z)-8-Isopropyl-1-methyl-5-methylenecyclodeca-1,6-diene	Terpenoids	C15H24	317819-80-0	1448	0.833567	0.712074	0.750827	0.925342	0.891675	0.688443
KMW0530	69	41	196.146	Geranyl acetate	Terpenoids	C12H20O2	105-87-3	1382	15.2071	18.9141	16.0796	10.4718	10.0728	8.87853
KMW0512	161	105	204.188	.alpha.-Cubebene	Terpenoids	C15H24	17699-14-8	1351	0.0351775	0.0478623	0.0405944	0.0927087	0.0870435	0.0791905
NMW0281	133	105	190.099	3-Butylisobenzofuran-1(3H)-one	Heterocyclic compound	C12H14O2	6066-49-5	1656	0.450458	0.286635	0.264421	1.59285	1.48947	1.35717
D338	119	204	204.188	1-methyl-4-(1,2,2-trimethylcyclopentyl)cyclohexa-1,3-diene	Terpenoids	C15H24	29621-78-1	1509	33.1318	37.2845	34.2219	74.92	73.1836	61.1027
KMW0537	81	68	204.188	Cyclohexane, 1-ethenyl-1-methyl-2,4-bis(1-methylethenyl)-, (1.alpha.,2.beta.,4.beta.)-	Terpenoids	C15H24	33880-83-0	1398	1.63933	2.03187	1.6923	1.33745	1.23941	1.13645
KMW0357	71	69	154.136	Bicyclo[2.2.1]heptan-2-ol, 2,3,3-trimethyl-	Terpenoids	C10H18O	465-31-6	1148	0.797112	0.942451	0.885728	0.763238	0.716317	0.646096
XMW0073	70	57	172.146	3-Methylheptyl acetate	Ester	C10H20O2	72218-58-7	1118	0.797583	1.08722	0.929899	0.747746	0.681404	0.633564
NMW0161	118	117	178.099	3-Phenyl-1-propanol, acetate	Ester	C11H14O2	122-72-5	1373	2.37484	3.4063	2.90768	3.41319	3.31542	2.72211
XMW1454	111	126	126.032	Isomaltol	Heterocyclic compound	C6H6O3	3420-59-5	989	0.186742	0.20759	0.226209	0.307553	0.291817	0.258224
XMW0958	57	41	282.084	1-Iodoundecane	Halogenated hydrocarbons	C11H23I	4282-44-4	1534	0.156267	0.158169	0.125644	0.232941	0.22587	0.187834
D270	89	71	158.131	Propanoic acid, 2-methyl-, pentyl ester	Ester	C9H18O2	2445-72-9	1057	0.0370166	0.0309325	0.039589	0.0621021	0.0533325	0.0417471
D282	81	83	238.193	Citronellyl tiglate	Terpenoids	C15H26O2	24717-85-9	1658	0.219649	0.232514	0.204095	1.12826	1.05787	0.946445
D110	71	99	168.115	Bicyclo[3.1.1]heptan-3-one, 2-hydroxy-2,6,6-trimethyl-	Ketone	C10H16O2	10136-65-9	1256	0.322183	0.259805	0.160013	0.160941	0.146172	0.135476
KMW0416	81	53	160.002	Furan, 2-[(methyldithio)methyl]-	Sulfur compounds	C6H8OS2	57500-00-2	1226	0.407925	0.496261	0.467696	0.407492	0.371834	0.342884
NMW0160	136	52	154.027	Benzoic Acid, 2,3-dihydroxy-	Acid	C7H6O4	303-38-8	1372	0.0620895	0.0728999	0.060287	0.10052	0.0948818	0.0836955
w10	58	71	198.198	2-Undecanone, 6,10-dimethyl-	Ketone	C13H26O	1604-34-8	1408	0.0438691	0.056845	0.0442391	0.0666435	0.0638736	0.0544596
XMW0213	70	71	186.162	Isopentyl hexanoate	Ester	C11H22O2	2198-61-0	1250	0.203342	0.23378	0.510707	0.520783	0.470592	0.435946
XMW0362	127	56	142.099	2H-Pyran-2-one, tetrahydro-4,6,6-trimethyl-	Heterocyclic compound	C8H14O2	20628-36-8	1141	0.254598	0.306026	0.296456	0.220409	0.201494	0.157016
XMW1057	85	39	85.053	Methacrylamide	Amine	C4H7NO	79-39-0	1149	0.308531	0.303457	0.287998	0.285318	0.242418	0.233586
NMW0052	83	55	150.104	2-Methyl-6-methyleneocta-2,7-dien-4-one	Terpenoids	C10H14O	539-70-8	1145	0.131397	0.160628	0.144158	0.151519	0.132568	0.125649
KMW0545	41	57	184.183	Dodecanal	Aldehyde	C12H24O	112-54-9	1409	0.23037	0.344114	0.234317	0.575169	0.528363	0.479679
D406	85	41	152.12	2,7-Octadien-4-ol, 2-methyl-6-methylene-, (S)-	Terpenoids	C10H16O	35628-00-3	1147	0.317256	0.311112	0.302125	0.292468	0.248163	0.238755
GMW0078	69	93	204.188	.beta.-Bisabolene	Terpenoids	C15H24	495-61-4	1509	17.229	19.0762	17.8718	36.0246	31.356	29.545
XMW0553	121	136	178.063	2-Acetoxyacetophenone	Ketone	C10H10O3	7250-94-4	1409	0.928936	1.10879	0.948086	1.83634	1.64484	1.51481
KMW0390	88	101	172.146	Octanoic acid, ethyl ester	Ester	C10H20O2	106-32-1	1198	1.38605	1.6613	1.6382	1.3632	1.21817	1.12303
XMW0826	93	134	134.048	3-Methylisoxazolo[4,5-b]pyridine	Heterocyclic compound	C7H6N2O	83988-39-0	1139	0.0691283	0.0378494	0.0472593	0.121523	0.112888	0.0904814
XMW0272	122	106	122.048	4-Pyridinecarboxamide	Heterocyclic compound	C6H6N2O	1453-82-3	1410	1.91816	2.33853	1.95278	3.82499	3.38516	3.13963
XMW0967	121	136	204.188	(1R,5S)-1,8-Dimethyl-4-(propan-2-ylidene)spiro[4.5]dec-7-ene	Terpenoids	C15H24	28400-12-6	1515	5.93908	6.71463	6.124	14.8456	13.2887	12.1975
NMW0039	150	108	150.054	DiSulfur compounds, dipropyl	Sulfur compounds	C6H14S2	629-19-6	1107	1.88845	2.40006	2.16174	1.70485	1.47851	1.38624
KMW0606	105	161	204.188	.alpha.-Muurolene	Terpenoids	C15H24	10208-80-7	1499	19.4478	21.6419	19.9113	44.5527	39.0063	36.3077
KMW0325	81	43	154.136	3-Cyclohexen-1-ol, 1-methyl-4-(1-methylethyl)-	Terpenoids	C10H18O	586-82-3	1137	0.11547	0.135652	0.127742	0.252863	0.201459	0.191148
XMW1020	91	92	242.031	(3-Bromo-1-methylpropoxymethyl)benzene	Aromatics	C11H15BrO	51666-29-6	1499	27.516	30.735	28.1504	62.3697	54.4479	50.6894
D244	161	105	222.198	(3S,3aR,3bR,4S,7R,7aR)-4-Isopropyl-3,7-dimethyloctahydro-1H-cyclopenta[1,3]cyclopropa[1,2]benzen-3-ol	Terpenoids	C15H26O	23445-02-5	1515	4.36576	5.11927	4.49389	10.9808	9.80443	8.96187
XMW1136	55	93	170.131	Lilac Alcohol C	Alcohol	C10H18O2	33081-36-6	1219	0.570066	0.584501	0.49653	0.502624	0.456193	0.409095
NMW0089	69	41	156.151	6-Octen-1-ol, 3,7-dimethyl-, (R)-	Terpenoids	C10H20O	1117-61-9	1220	0	0	0	0.0688784	0.0631017	0.055862
KMW0190	42	122	122.084	Pyrazine, trimethyl-	Heterocyclic compound	C7H10N2	14667-55-1	1004	0.192297	0.276945	0.191943	0.108883	0.10147	0.0838328
XMW1107	69	113	182.106	N,N'-Methylenebismethacrylamide	Amine	C9H14N2O2	2359-15-1	1651	0	0	0	0.392046	0.363252	0.314271
XMW0166	69	41	152.12	3,7-Nonadien-2-one, 8-methyl-, (E)-	Ketone	C10H16O	35408-14-1	1144	0.172828	0.198343	0.222218	0.2847	0.255163	0.231308
NMW0070	105	77	148.052	1,2-Propanedione, 1-phenyl-	Ketone	C9H8O2	579-07-7	1183	0.700084	0.119826	0.0972362	0.132672	0.120485	0.107602
XMW0698	108	41	204.188	1,4-Methano-1H-indene, octahydro-4-methyl-8-methylene-7-(1-methylethyl)-, [1S-(1.alpha.,3a.beta.,4.alpha.,7.alpha.,7a.beta.)]-	Terpenoids	C15H24	3650-28-0	1396	0.0451821	0.0540194	0.03556	0.0834404	0.0751322	0.0677523
KMW0372	89	71	172.146	Butanoic acid, hexyl ester	Ester	C10H20O2	2639-63-6	1192	17.151	20.118	20.0744	16.8242	15.0184	13.615
KMW0613	41	93	204.188	.alpha.-Farnesene	Terpenoids	C15H24	502-61-4	1508	6.84457	11.8114	10.9001	22.5499	19.6617	18.1342
XMW1342	156	141	156.094	Naphthalene, 1,4-dimethyl-	Aromatics	C12H12	571-58-4	1436	0.0857932	0.102679	0.0760573	0.107919	0.0922556	0.0859721
NMW0099	129	102	129.058	Quinoline	Heterocyclic compound	C9H7N	91-22-5	1238	0.137728	0.156557	0.175859	0.158615	0.145851	0.125946
KMW0424	103	57	186.162	Butanoic acid, 2-methyl-, hexyl ester	Ester	C11H22O2	10032-15-2	1236	4.23843	5.1103	3.71301	4.21077	3.81261	3.37716
XMW0379	93	133	204.188	Bicyclo[5.2.0]nonane, 2-methylene-4,8,8-trimethyl-4-vinyl-	Terpenoids	C15H24	242794-76-9	1407	1.51689	1.72627	1.47906	2.8217	2.48512	2.26201
NMW0092	41	93	154.136	(+)-neodihydrocarveol	Terpenoids	C10H18O	18675-33-7	1226	0.54634	0.425789	0.498115	0.674121	0.595967	0.539446
XMW0725	84	83	152.12	(-)-cis-Isopiperitenol	Terpenoids	C10H16O	96555-02-1	1228	1.00091	1.21128	0.840932	0.936029	0.843823	0.745797
KMW0432	41	69	152.12	2,6-Octadienal, 3,7-dimethyl-, (Z)-	Terpenoids	C10H16O	106-26-3	1240	0.669826	0.764816	0.645584	0.561032	0.512116	0.432837
XMW1035	205	41	220.183	(-)-Spathulenol	Terpenoids	C15H24O	77171-55-2	1577	0.115676	0.131707	0.110801	0.1118	0.100845	0.0883763
NMW0215	71	135	181.005	N,N-Dimethyl-1,2,3-trithian-5-Amine	Heterocyclic compound	C5H11NS3	31895-21-3	1491	0	0	0	49.378	39.7945	35.7254
XMW0296	112	70	172.146	Acetic acid, octyl ester	Ester	C10H20O2	112-14-1	1210	0.140252	0.171965	0.153541	0.176582	0.159825	0.138785
KMW0144	74	87	130.099	Hexanoic acid, methyl ester	Ester	C7H14O2	106-70-7	925	0.198075	0.217223	0.245454	0.366238	0.325027	0.267842
KMW0204	69	56	144.115	Acetic acid, hexyl ester	Ester	C8H16O2	142-92-7	1014	0.392088	0.605162	0.385708	0.232987	0.210045	0.179685
KMW0490	99	41	156.115	trans-3-Methyl-4-octanolide	Ester	C9H16O2	39638-67-0	1288	0.68505	0.917472	0.861323	1.29903	1.12325	1.01806
KMW0568	99	71	170.131	2H-Pyran-2-one, tetrahydro-6-pentyl-	Ester	C10H18O2	705-86-2	1497	19.2169	16.7729	13.2548	71.4111	59.062	53.8299
XMW0242	57	71	184.219	Undecane, 3,9-dimethyl-	Hydrocarbons	C13H28	17301-31-4	1185	0.576505	0.661321	0.679188	0.646279	0.573813	0.501024
XMW0051	107	51	107.037	4-Pyridinecarboxaldehyde	Heterocyclic compound	C6H5NO	872-85-5	976	0.225059	0.255165	0.258913	0.260695	0.220664	0.19302
XMW1036	79	67	216.188	Cyclobuta[1,2:3,4]dicyclooctene, 1,2,5,6,6a,6b,7,8,11,12,12a,12b-dodecahydro-, (6a.alpha.,6b.beta.,12a.alpha.,12b.beta.)-	Hydrocarbons	C16H24	61277-44-9	1687	0.117288	0.137328	0.0899496	0.591772	0.506076	0.442124
XMW1476	135	77	164.084	1-Propanone, 1-(4-methoxyphenyl)-	Ketone	C10H12O2	121-97-1	1513	3.00399	3.45061	3.14146	7.73237	6.89554	6.36689
XMW0089	84	41	154.136	4-Decenal, (E)-	Aldehyde	C10H18O	65405-70-1	1198	5.67677	6.70133	6.77146	4.81143	4.29725	3.8134
XMW0186	95	43	124.089	3,5-Octadien-2-one, (E,E)-	Ketone	C8H12O	30086-02-3	1073	0.476305	0.603168	0.551025	0.646437	0.611862	0.567743
XMW0487	92	65	138.043	2-Picoline, 6-nitro-	Heterocyclic compound	C6H6N2O2	18368-61-1	1183	10.8091	10.866	8.90365	8.75507	7.1118	8.35063
WMW0007	107	93	204.188	[1S-(1.alpha.,7.alpha.,8a.beta.)]-1,2,3,5,6,7,8,8a-octahydro-1,4-dimethyl-7-(1-methylethenyl)-Azulene	Terpenoids	C15H24	3691-11-0	1505	34.5578	38.7459	35.4087	79.8879	70.0143	65.3602
XMW0638	71	43	142.099	2,3'-Bifuran, octahydro-	Heterocyclic compound	C8H14O2	73373-15-6	1079	0.33909	0.362675	0.341492	0.532839	0.51284	0.482264
XMW0366	119	134	134.11	Benzene, 1,2,3,5-tetramethyl-	Aromatics	C10H14	527-53-7	1117	0.0519458	0.0410417	0.0454462	0.151949	0.132112	0.16081
XMW1440	69	41	154.063	2-methylprop-2-enoyl 2-methylprop-2-enoate	Others	C8H10O3	760-93-0	1054	0.261051	0.519365	0.119832	0.349262	0.315248	0.257929
WMW0214	71	57	156.188	Nonane, 4,5-dimethyl-	Hydrocarbons	C11H24	17302-23-7	1046	0.0853677	0.0971442	0.0857645	0.0998128	0.0906706	0.0813631
D299	69	41	154.136	Ethanol, 2-(3,3-dimethylcyclohexylidene)-, (Z)-	Alcohol	C10H18O	26532-23-0	1267	1.07511	1.045	1.00982	1.50987	1.4433	1.45171
XMW0715	108	137	137.084	BenzenAmine, 4-ethoxy-	Amine	C8H11NO	156-43-4	1281	0.0268805	0.0355002	0.0330142	0.043153	0.0452374	0.0333094
XMW0084	121	136	136.125	2,4,6-Octatriene, 2,6-dimethyl-	Terpenoids	C10H16	673-84-7	1131	0.120389	0.0980469	0.11144	0.275495	0.240532	0.247054
KMW0207	95	96	128.03	2-Furanmethanethiol, 5-methyl-	Heterocyclic compound	C6H8OS	59303-05-8	995	0.244038	0.296578	0.268636	0.319672	0.274372	0.271131
KMW0188	120	105	120.007	2-Methyl-1,3-dithiacyclopentane	Heterocyclic compound	C4H8S2	5616-51-3	1026	0	0	0	0.0414414	0.0345939	0.03946
D342	121	79	136.125	2,4,6-Octatriene, 2,6-dimethyl-, (E,E)-	Terpenoids	C10H16	3016-19-1	1144	0	0	0	0.263803	0.271155	0.240769
XMW1389	136	121	136.089	2,3-Dimethylanisole	Ether	C9H12O	2944-49-2	1144	0.054422	0.0433186	0.0567733	0.125057	0.126969	0.11533
KMW0610	57	85	238.193	Bornyl isovalerate	Ester	C15H26O2	76-50-6	1484	0.105813	0.0561764	0.0429849	0.148026	0.165365	0.0604384
D293	93	119	204.188	Cyclohexene, 4-[(1E)-1,5-dimethyl-1,4-hexadien-1-yl]-1-methyl-	Terpenoids	C15H24	25532-79-0	1512	62.2445	69.3395	64.0675	137.437	120.1	112.544
XMW0265	57	71	240.282	Tetradecane, 2,6,10-trimethyl-	Hydrocarbons	C17H36	14905-56-7	1539	0.20478	0.24181	0.203292	0.324694	0.31223	0.276006
XMW0170	134	133	134.073	BenzAldehyde, 3-ethyl-	Aldehyde	C9H10O	34246-54-3	1168	0.105996	0.120732	0.1159	0	0	0
XMW1448	137	109	152.12	3,6-Dimethyl-2,3,3a,4,5,7a-hexahydrobenzofuran	Heterocyclic compound	C10H16O	70786-44-6	1192	0.158315	0.154608	0.143626	0.127789	0.111499	0.10891
NMW0044	106	121	121.089	BenzenAmine, N-ethyl-	Amine	C8H11N	103-69-5	1128	0.0396451	0.0286502	0.0377032	0.0830032	0.0743526	0.0716216
WMW0176	42	70	114.068	2H-Pyran-2-one, tetrahydro-6-methyl-	Heterocyclic compound	C6H10O2	823-22-3	1095	0.0965254	0.118019	0.102877	0.158474	0.152151	0.144835
D197	67	109	152.12	3-Oxatricyclo[4.1.1.0(2,4)]octane, 2,7,7-trimethyl-	Terpenoids	C10H16O	1686-14-2	1095	1.22111	1.52736	1.57644	2.27255	1.9935	1.91979
KMW0602	57	71	212.25	Pentadecane	Hydrocarbons	C15H32	629-62-9	1500	0.0641617	0.0797389	0.0739602	0.134256	0.114451	0.107545
D173	105	77	134.073	BenzeneacetAldehyde, 4-methyl-	Aldehyde	C9H10O	104-09-6	1120	0	0	0	0.231778	0.261408	0.273654
XMW0149	83	42	98.084	1H-Pyrazole, 4,5-dihydro-5,5-dimethyl-	Heterocyclic compound	C5H10N2	4320-85-8	983	0.132324	0.147655	0.147019	0.186707	0.179523	0.154965
NMW0034	81	69	152.12	Fenchone	Terpenoids	C10H16O	1195-79-5	1096	0.905799	1.24902	1.18863	1.72698	1.49186	1.47568
WMW0086	136	94	136.038	DiSulfur compounds, ethyl 1-methylethyl	Sulfur compounds	C5H12S2	53966-36-2	985	0.110429	0.25664	0.133489	0.385574	0.346403	0.348608
XMW0417	79	93	136.125	Cyclohexene, 4-methyl-1-(1-methylethenyl)-	Hydrocarbons	C10H16	586-67-4	1073	0.531962	0.713875	0.666584	0.798868	0.74394	0.71942
KMW0454	68	79	150.104	1-Cyclohexene-1-carboxAldehyde, 4-(1-methylethenyl)-	Aldehyde	C10H14O	2111-75-3	1274	0	0	0	0.0844537	0.0730705	0.0602165
WMW0127	55	81	128.12	3-Octen-1-ol, (Z)-	Alcohol	C8H16O	20125-84-2	1055	1.06058	1.34032	1.39189	1.70823	1.56474	1.37659
XMW0987	131	119	202.172	Eudesma-2,4,11-triene	Terpenoids	C15H22	82462-31-5	1479	0.31205	0.28908	0.244303	0.458884	0.426416	0.454047
KMW0585	81	95	226.193	Citronellyl isobutyrate	Ester	C14H26O2	97-89-2	1483	0.21901	0.298941	0.158814	0.366063	0.334819	0.301033
XMW0793	79	41	162.141	1,7-Octadiene, 2,7-dimethyl-3,6-bis(methylene)-	Hydrocarbons	C12H18	16714-60-6	1083	0.806325	1.0108	0.950829	1.36884	1.3469	1.36132
XMW0269	85	57	186.126	2-Methylbutanoic anhydride	Others	C10H18O3	1468-39-9	1190	0.721073	0.938889	0.834683	0.930887	0.72222	0.7866
XMW0961	95	93	196.146	Bornyl acetate	Terpenoids	C12H20O2	76-49-3	1285	0.147721	0.134888	0.109269	0.154818	0.133179	0.133675
XMW0179	57	71	212.25	Dodecane, 2,6,11-trimethyl-	Hydrocarbons	C15H32	31295-56-4	1275	0.149493	0.177608	0.124182	0.166577	0.168939	0.155914
XMW0119	69	41	140.12	Cyclopentanone, 2-methyl-3-(1-methylethyl)-	Ketone	C9H16O	54549-81-4	1028	0	0	0	0.0719292	0.0672538	0.0659497
XMW1227	69	41	154.099	(E)-2-Methylbut-2-en-1-yl methacrylate	Ester	C9H14O2	88142-95-4	1088	0.552206	0.758765	0.71253	0.989225	0.864195	0.930791
GMW0113	41	39	146.022	Diallyl disulphide	Sulfur compounds	C6H10S2	2179-57-9	1081	0.362415	0.524201	0.477977	0.677605	0.649124	0.641797
XMW0720	91	134	152.12	cis-p-Mentha-2,8-dien-1-ol	Terpenoids	C10H16O	3886-78-0	1140	0.28505	0.251445	0.237786	0.643134	0.608032	0.59518
KMW0629	55	69	186.198	1-Dodecanol	Alcohol	C12H26O	112-53-8	1474	0.148799	0.220312	0.119495	0.211143	0.18025	0.181223
XMW1429	70	82	113.059	1-(2-Hydroxyethyl)-1,2,4-triazole	Heterocyclic compound	C4H7N3O	3273-14-1	1095	0.316132	0.281724	0.411003	0.582333	0.505282	0.481589
XMW1401	82	67	184.146	n-Valeric acid cis-3-hexenyl ester	Ester	C11H20O2	35852-46-1	1237	5.03882	6.0645	5.74032	5.891	5.2492	4.84412
XMW0153	121	136	136.125	1,3-Cyclopentadiene, 1,2,3,4,5-pentamethyl-	Hydrocarbons	C10H16	4045-44-7	983	0.264608	0.243421	0.307292	0.688574	0.618424	0.636458
KMW0193	93	41	136.125	.beta.-Pinene	Terpenoids	C10H16	127-91-3	981	4.48017	4.08947	5.22134	12.1334	11.0759	10.2926
XMW0438	107	79	136.089	Furan, 2-(1-pentenyl)-, (E)-	Heterocyclic compound	C9H12O	20992-69-2	1000	0.114799	0.12379	0.148114	0.362798	0.367904	0.370921
KMW0244	121	136	136.1	Pyrazine, 2-methyl-5-(1-methylethyl)-	Heterocyclic compound	C8H12N2	13925-05-8	1059	0.116286	0.111634	0.119017	0.220781	0.208518	0.160586
KMW0447	41	81	154.136	3,6-Octadien-1-ol, 3,7-dimethyl-, (Z)-	Terpenoids	C10H18O	5944-20-7	1240	0.0741666	0.11941	0.0959402	0.0502276	0.0673536	0.0700185
XMW0522	92	121	121.089	Pyridine, 3-propyl-	Heterocyclic compound	C8H11N	4673-31-8	986	0.551941	0.429999	0.583734	1.35559	1.22256	1.29329
KMW0070	91	106	106.078	Benzene, 1,3-dimethyl-	Aromatics	C8H10	108-38-3	866	0.0867059	0.0830857	0.0935343	0.121752	0.105541	0.106142
XMW0202	69	41	138.141	cis-2,6-Dimethyl-2,6-octadiene	Hydrocarbons	C10H18	2492-22-0	985	1.60492	1.56958	1.95538	4.50602	4.08018	4.20127
NMW0031	84	42	141.115	Hygrine	Heterocyclic compound	C8H15NO	496-49-1	1092	0.244435	0.333388	0.321413	0.485311	0.419412	0.451539
KMW0473	79	107	150.104	4-Isopropylcyclohexa-1,3-dienecarbAldehyde	Aldehyde	C10H14O	1197-15-5	1283	0	0	0	0.150502	0.141582	0.0930094
XMW0177	109	79	124.089	Ethanone, 1-(2-methyl-1-cyclopenten-1-yl)-	Ketone	C8H12O	3168-90-9	996	0.0940466	0.0948117	0.108761	0.198374	0.182557	0.164759
XMW0110	57	71	198.235	Dodecane, 4,6-dimethyl-	Hydrocarbons	C14H30	61141-72-8	1325	0.0783971	0.0754475	0.0641932	0.104295	0.0896064	0.0953589
XMW0521	68	79	136.125	1,7-Octadiene, 2-methyl-6-methylene-	Terpenoids	C10H16	1686-30-2	984	0.217583	0.306543	0.313723	0.656332	0.588093	0.58137
KMW0267	105	77	136.052	Benzoic acid, methyl ester	Ester	C8H8O2	93-58-3	1094	1.53869	1.72485	1.67108	2.34133	2.14265	1.96793
XMW0192	93	121	136.125	(+)-4-Carene	Terpenoids	C10H16	29050-33-7	1009	0.132699	0.123963	0.141382	0.241932	0.26029	0.283943
KMW0192	122	107	122.073	Benzene, 1-methoxy-2-methyl-	Ether	C8H10O	578-58-5	1008	0	0	0	0.0873014	0.130124	0.12114
KMW0223	121	93	136.125	1,3-Cyclohexadiene, 1-methyl-4-(1-methylethyl)-	Terpenoids	C10H16	99-86-5	1012	0.103086	0.280825	0.346412	0.47202	0.419811	0.421525
XMW1068	115	58	115.038	4-Methylurazole	Heterocyclic compound	C3H5N3O2	16312-79-1	1039	0.267816	0.303422	0.297545	0.671596	0.605638	0.55481
XMW0933	119	134	194.131	Bicyclo[3.1.1]hept-2-en-6-ol, 2,7,7-trimethyl-, acetate, [1S-(1.alpha.,5.alpha.,6.beta.)]-	Ester	C12H18O2	50764-55-1	1239	0.0735448	0.133734	0.104123	0.105056	0.102344	0.0888906
NMW0023	91	119	120.058	BenzAldehyde, 2-methyl-	Aldehyde	C8H8O	529-20-4	1064	0.724644	0.923872	0.930556	1.37939	1.27562	1.35188
KMW0459	41	69	152.12	2,6-Octadienal, 3,7-dimethyl-, (E)-	Terpenoids	C10H16O	141-27-5	1270	0.454505	0.501922	0.414458	0.643034	0.60158	0.59275
KMW0382	108	107	108.058	Phenol, 2-methyl-	Phenol	C7H8O	95-48-7	1054	0.106831	0.156837	0.14653	0.351561	0.27361	0.317189
XMW0076	92	65	92.037	1H-Pyrrole-3-carbonitrile	Heterocyclic compound	C5H4N2	7126-38-7	1044	0	0	0	1.7407	1.48003	1.74714
KMW0280	95	43	124.089	3,5-Octadien-2-one	Ketone	C8H12O	38284-27-4	1091	0.571678	0.80193	0.746086	1.00975	0.862046	0.824786
KMW0212	91	92	120.058	BenzeneacetAldehyde	Aldehyde	C8H8O	122-78-1	1049	0.483518	0.438489	0.523436	1.3021	1.13461	1.20166
KMW0247	93	77	136.125	.beta.-Phellandrene	Terpenoids	C10H16	555-10-2	1031	0.983698	0.954204	1.11371	2.79475	2.46845	2.53091
KMW0182	81	82	138.104	Furan, 2-pentyl-	Heterocyclic compound	C9H14O	3777-69-3	993	1.48904	1.86993	1.75826	1.42425	1.40832	1.21004
KMW0226	68	93	136.125	Limonene	Terpenoids	C10H16	138-86-3	1026	0.177534	0.192751	0.271492	1.09784	0.987207	1.03105
XMW1286	97	98	98.048	1H-Imidazole-4-methanol	Heterocyclic compound	C4H6N2O	822-55-9	1080	0.655923	0.705593	0.666159	0.99575	0.975194	0.940611
XMW3734	122	121	122.037	2-hydroxy-BenzAldehyde	Aldehyde	C7H6O2	90-02-8	1047	0	0	0	0.0402776	0.0364991	0.0338102
XMW1218	58	43	172.146	2-Nonanone, 3-(hydroxymethyl)-	Ketone	C10H20O2	67801-33-6	1093	0.12129	0.128918	0.132433	0.177577	0.178533	0.168345
KMW0257	136	93	154.136	Bicyclo[3.1.0]hexan-2-ol, 2-methyl-5-(1-methylethyl)-, (1.alpha.,2.beta.,5.alpha.)-	Terpenoids	C10H18O	15537-55-0	1070	0.0563676	0.054875	0.0624979	0.149468	0.137887	0.128385
WMW0105	41	69	152.157	1,7-Nonadiene, 4,8-dimethyl-	Hydrocarbons	C11H20	62108-28-5	1026	0	0	0	0.160516	0.16155	0.211546
XMW0714	94	109	109.053	3-Acetyl-1H-pyrroline	Heterocyclic compound	C6H7NO	1072-82-8	1035	0.93465	1.39626	1.35894	3.40778	2.54776	2.90492
KMW0235	93	41	136.125	1,3,6-Octatriene, 3,7-dimethyl-, (Z)-	Terpenoids	C10H16	3338-55-4	1038	9.29125	12.4607	12.2382	29.594	22.0398	25.8569
D246	69	93	224.178	Propanoic acid, 2-methyl-, 3,7-dimethyl-2,6-octadienyl ester, (Z)-	Ester	C14H24O2	2345-24-6	1475	0.14032	0.166399	0.103958	0.1512	0.127158	0.109
WMW0126	67	95	124.125	1,3-Hexadiene, 3-ethyl-2-methyl-	Hydrocarbons	C9H16	61142-36-7	1031	0	0	0	0.719963	0.617397	0.599618
D409	81	59	154.136	(S)-2,5-Dimethyl-3-vinylhex-4-en-2-ol	Alcohol	C10H18O	35671-15-9	1039	0.891008	1.09305	0.913338	2.12722	2.01794	1.74023
D364	81	82	138.079	2-Ethoxy-3-methylpyrazine	Heterocyclic compound	C7H10N2O	32737-14-7	1065	0.0892124	0.108507	0.0818934	0.0968866	0.0854629	0.0876796
XMW1127	56	70	158.131	Formic acid, octyl ester	Ester	C9H18O2	112-32-3	1114	1.87435	2.16569	1.9406	2.40692	2.21207	2.06926
WMW0082	41	55	152.157	1,10-Undecadiene	Hydrocarbons	C11H20	13688-67-0	1095	2.97627	3.11788	3.59168	5.07571	4.6013	3.87765
XMW0486	82	56	140.12	Cyclohexanone, 2,2,6-trimethyl-	Ketone	C9H16O	2408-37-9	1036	1.45017	0.603769	0.507358	0.188268	0.16889	0.158082
WMW0100	55	41	142.136	3-Nonen-1-ol, (E)-	Alcohol	C9H18O	10339-61-4	1143	0.219565	0.257202	0.242925	0.359133	0.329532	0.311423
XMW0011	119	105	134.11	Benzene, 1,4-diethyl-	Aromatics	C10H14	105-05-5	1041	0.724932	0.789054	0.798425	1.93331	1.71479	1.68615
KMW0266	97	45	129.991	2-Thiophenemethanethiol	Heterocyclic compound	C5H6S2	6258-63-5	1105	0.624767	0.65109	0.592499	0.775781	0.730201	0.768867
KMW0323	79	108	108.058	Benzyl Alcohol	Alcohol	C7H8O	100-51-6	1036	5.61959	6.43477	6.34882	11.9322	8.96106	10.7585
XMW1311	65	122	122.037	2-Propenal, 3-(2-furanyl)-	Heterocyclic compound	C7H6O2	623-30-3	1111	0.448852	0.486594	0.434302	0.621055	0.560698	0.616309
D313	73	45	172.146	3-Hexene, 1-(1-ethoxyethoxy)-, (Z)-	Aldehyde	C10H20O2	28069-74-1	1102	0.146522	0.195124	0.172656	0.211107	0.200943	0.16812
XMW0279	67	45	114.104	E-1-Methoxy-4-hexene	Hydrocarbons	C7H14O	134777-60-9	801	0.173806	0.198663	0.181842	0.116616	0.0593367	0.0934093
KMW0469	137	152	152.084	Phenol, 4-ethyl-2-methoxy-	Phenol	C9H12O2	2785-89-9	1282	0.224396	0.234333	0.199254	0.302168	0.279038	0.287541
NMW0016	82	67	142.099	Acetic acid, cyclohexyl ester	Ester	C8H14O2	622-45-7	1043	0.0683793	0.0656831	0.0797858	0.148267	0.177573	0.150399
D272	70	85	172.146	Butanoic acid, 3-methyl-, 2-methylbutyl ester	Ester	C10H20O2	2445-77-4	1107	0.653464	0.948363	0.813235	1.0627	0.977565	1.13322
XMW1203	42	41	114.032	2,5-Furandione, dihydro-3-methyl-	Heterocyclic compound	C5H6O3	4100-80-5	1057	0	0	0	0.233709	0.237788	0.173
D81	81	94	168.079	2-Furanpropanoic acid, ethyl ester	Heterocyclic compound	C9H12O3	10031-90-0	1192	0.63229	0.72225	0.651323	0.509197	0.443828	0.422867
KMW0291	71	93	154.136	Linalool	Terpenoids	C10H18O	78-70-6	1099	22.0034	25.2952	23.0177	34.9751	32.0208	30.7909
XMW0410	55	83	142.136	1-Nonen-4-ol	Alcohol	C9H18O	35192-73-5	1103	7.71683	9.51112	8.71395	0	0	0
KMW0220	93	91	136.125	3-Carene	Terpenoids	C10H16	13466-78-9	1009	0.136634	0.126665	0.176099	0.367704	0.25434	0.336722
XMW0771	68	67	136.125	1,5-Cyclooctadiene, 3,4-dimethyl-	Hydrocarbons	C10H16	21284-05-9	1046	0.655609	2.06813	0.257961	0.864325	0.888804	0.739394
XMW0925	93	108	150.104	Camphenone, 6-	Ketone	C10H14O	55659-42-2	1114	19.9755	22.1844	21.8429	30.7152	28.0773	25.8348
XMW0159	57	71	226.266	2,6,10-Trimethyltridecane	Hydrocarbons	C16H34	3891-99-4	1449	0.299951	0.360202	0.293703	0.622172	0.436953	0.418607
KMW0312	69	81	150.104	Furan, 3-(4-methyl-3-pentenyl)-	Terpenoids	C10H14O	539-52-6	1101	4.27131	4.86949	4.42244	7.81014	7.16268	6.20647
KMW0301	93	43	154.136	Bicyclo[3.1.0]hexan-2-ol, 2-methyl-5-(1-methylethyl)-, (1.alpha.,2.alpha.,5.alpha.)-	Terpenoids	C10H18O	17699-16-0	1070	1.43058	1.93694	1.84396	2.20282	2.11747	2.00557
KMW0287	67	41	138.104	(Z,Z)-3,6-Nonadienal	Aldehyde	C9H14O	21944-83-2	1100	3.24389	3.58608	3.03538	9.47109	8.36369	7.62203
KMW0488	57	71	184.219	Tridecane	Hydrocarbons	C13H28	629-50-5	1300	1.45128	1.66131	1.49134	1.64371	1.50383	1.36714
KMW0460	69	41	154.136	Geraniol	Terpenoids	C10H18O	106-24-1	1255	0.515877	0.592465	0.471266	0.43251	0.374597	0.34692
KMW0150	105	120	120.094	Benzene, 1,2,4-trimethyl-	Aromatics	C9H12	95-63-6	990	0	0	0	0.257147	0.228314	0.248473
NMW0101	121	136	168.115	Ascaridole	Terpenoids	C10H16O2	512-85-6	1244	0.0487476	0.0468988	0.0446688	0.0692319	0.0231734	0.0203372
KMW0534	56	57	200.178	Butyl caprylate	Ester	C12H24O2	589-75-3	1389	0.121396	0.156355	0.120099	0.163405	0.200151	0.134217
XMW1471	84	42	127.136	1-ButanAmine, N-methyl-N-2-propenyl-	Amine	C8H17N	24209-62-9	856	0.0351281	0.0345676	0.0288872	0	0	0
KMW0208	57	43	142.172	Decane	Hydrocarbons	C10H22	124-18-5	1000	0	0	0	0.0754729	0.0684248	0.0796615
KMW0234	119	134	134.11	p-Cymene	Aromatics	C10H14	99-87-6	1027	0.27819	0.221418	0.269349	0.549711	0.474051	0.464706
NMW0025	94	43	136.052	Acetic acid, phenyl ester	Ester	C8H8O2	122-79-2	1067	1.73632	2.40639	2.28613	2.77345	2.65889	2.51011
NMW0287	79	67	232.219	1,8,11,14-Heptadecatetraene, (Z,Z,Z)-	Hydrocarbons	C17H28	10482-53-8	1664	0.535895	0.312766	0.291843	1.45909	1.3817	1.46611
XMW1491	93	69	252.209	Lavandulyl caproate	Ester	C16H28O2	59550-36-6	1650	0.354972	0.361748	0.285453	1.77778	1.63422	1.46104
KMW0386	67	95	152.12	cis-Dihydrocarvone	Terpenoids	C10H16O	3792-53-8	1195	3.53994	4.04469	3.82579	2.64193	2.35072	2.14862
KMW0413	82	54	150.104	(-)-Carvone	Terpenoids	C10H14O	6485-40-1	1254	0.289386	0.291493	0.238585	0.30012	0.241614	0.254541
XMW1320	69	41	154.099	4-Isopropyl-1,3-cyclohexanedione	Ketone	C9H14O2	62831-62-3	1258	0.598415	0.652917	0.596256	0	0	0
WMW0205	99	71	142.099	2,5-Octanedione	Ketone	C8H14O2	3214-41-3	984	0.129391	0.182	0.179261	0.145643	0.128371	0.105549
NMW0105	107	136	136.089	Phenol, 4-propyl-	Phenol	C9H12O	645-56-7	1260	0.69516	0.748776	0.615283	0.714734	0.596806	0.640095
D188	80	123	123.043	Pyrazinamide	Heterocyclic compound	C5H5N3O	98-96-4	1250	0.0996824	0.122332	0.145434	0.169421	0.0836487	0.139769
KMW0551	57	71	198.235	Tetradecane	Hydrocarbons	C14H30	629-59-4	1400	0.622173	0.827996	0.628127	1.04795	0.977908	0.64504
XMW0937	119	109	194.131	(1R,5S,6R)-2,7,7-Trimethylbicyclo[3.1.1]hept-2-en-6-yl acetate	Ester	C12H18O2	67999-48-8	1262	0.0486605	0.0516114	0.0575712	0.0763998	0.0739188	0.0904859
D407	68	69	154.136	7-Octen-4-ol, 2-methyl-6-methylene-, (S)-	Terpenoids	C10H18O	35628-05-8	1097	2.17561	2.95849	2.61464	3.43844	3.15038	3.26945
XMW1118	55	83	112.089	CyclohexanecarboxAldehyde	Aldehyde	C7H12O	2043-61-0	963	0.112012	0.0945034	0.105491	0.127728	0.138351	0.0828465
D191	110	95	166.099	2-Hexanoylfuran	Heterocyclic compound	C10H14O2	14360-50-0	1239	1.50402	1.63201	1.3188	1.58905	1.33556	1.39088
KMW0274	126	71	126.032	Maltol	Heterocyclic compound	C6H6O3	118-71-8	1110	0.0623222	0.067793	0.0572176	0.0698103	0.0619663	0.0625202
KMW0294	57	41	128.12	2-Octen-1-ol, (E)-	Alcohol	C8H16O	18409-17-1	1067	0.125096	0.149948	0.149772	0.160237	0.137823	0.135657
XMW0201	69	41	98.073	4-Hexen-3-one	Ketone	C6H10O	2497-21-4	855	1.20416	1.39681	1.24343	3.87807	0.444256	0.439573
KMW0376	45	69	144.151	2-Nonanol	Alcohol	C9H20O	628-99-9	1102	0.271327	0.2963	0.26712	0.339397	0.314546	0.272808
KMW0350	108	91	150.068	Acetic acid, phenylmethyl ester	Ester	C9H10O2	140-11-4	1162	0.318465	0.378579	0.322866	0	0	0
KMW0302	139	69	154.136	(2S,4R)-4-Methyl-2-(2-methylprop-1-en-1-yl)tetrahydro-2H-pyran	Terpenoids	C10H18O	3033-23-6	1110	0.775566	0.840241	0.777064	1.06535	0.94567	0.918705
D373	79	77	112.089	2,4-Heptadien-1-ol, (E,E)-	Alcohol	C7H12O	33467-79-7	1004	0.0567146	0.0697344	0.101659	0.168615	0.102956	0.101775
D200	124	95	124.052	Benzenemethanol, 3-hydroxy-	Alcohol	C7H8O2	620-24-6	1257	0.0556089	0.0598714	0.0561572	0.070882	0.0642175	0.05621
D306	85	41	154.136	1,5-Heptadien-4-ol, 3,3,6-trimethyl-	Terpenoids	C10H18O	27644-04-8	1084	1.47679	1.6859	1.34629	1.35957	1.18653	1.34175
KMW0098	67	41	100.089	3-Hexen-1-ol, (Z)-	Alcohol	C6H12O	928-96-1	858	0.127087	0.124147	0.111268	0	0	0
XMW0239	57	85	184.219	Decane, 3-ethyl-3-methyl-	Hydrocarbons	C13H28	17312-66-2	1229	3.25397	3.88724	3.48457	2.77223	2.49032	2.20366
D366	140	55	140.12	3-Octen-2-one, 7-methyl-	Ketone	C9H16O	33046-81-0	1113	0.0883814	0.099566	0.0840626	0.109698	0.103527	0.100493
w43	42	55	114.068	2-Oxepanone	Ester	C6H10O2	502-44-3	1065	0.241865	0.208866	0.253912	0.201822	0.177605	0.185558
XMW0909	80	79	150.104	2,6,6-Trimethylbicyclo[3.2.0]hept-2-en-7-one	Ketone	C10H14O	4613-37-0	1108	7.59947	8.4909	8.41844	12.9135	10.7518	9.89831
XMW0713	82	110	110.073	2-Cyclohexen-1-one, 3-methyl-	Ketone	C7H10O	1193-18-6	1075	3.66153	3.60547	3.4241	3.67489	2.82808	2.98357
XMW0299	71	43	144.115	Butanoic acid, butyl ester	Ester	C8H16O2	109-21-7	995	0.200034	0.206604	0.209929	0.275614	0.233688	0.222324
KMW0377	57	82	184.146	cis-3-Hexenyl-.alpha.-methylbutyrate	Ester	C11H20O2	53398-85-9	1234	2.22362	2.73575	2.62626	1.97318	1.73452	1.59394
XMW0412	123	138	138.068	3-Acetyl-2,5-dimethyl furan	Heterocyclic compound	C8H10O2	10599-70-9	1099	0.0874643	0.118082	0.102323	0.145972	0.12882	0.107578
D316	136	79	136.125	Adamantane	Hydrocarbons	C10H16	281-23-2	1116	1.98164	2.13661	1.98236	2.82597	2.7389	2.51239
XMW0603	121	136	136.089	Benzene, 1-ethyl-4-methoxy-	Aromatics	C9H12O	1515-95-3	1110	6.3882	6.90733	5.34701	9.04753	8.78196	8.12809
XMW0267	84	56	113.12	2-Ethylpiperidine	Heterocyclic compound	C7H15N	1484-80-6	1026	0.36364	0.553238	0.540729	0.155264	0.144102	0.169279
KMW0366	82	67	170.131	Butanoic acid, 3-hexenyl ester, (Z)-	Ester	C10H18O2	16491-36-4	1187	15.5749	18.3921	18.9035	21.1797	20.0412	18.5464
NMW0040	134	91	134.073	Benzyl methyl ketone	Ketone	C9H10O	103-79-7	1124	0.201427	0.163276	0.178721	0.535416	0.477619	0.469278
D456	55	67	184.183	8-Dodecen-1-ol, (Z)-	Alcohol	C12H24O	40642-40-8	1468	0.206167	0.265344	0.173122	0.319888	0.266703	0.276015
KMW0276	56	55	130.136	1-Octanol	Alcohol	C8H18O	111-87-5	1072	0.148034	0.133451	0.164404	0.13352	0.145973	0.15661
KMW0539	83	55	112.052	2(5H)-Furanone, 5-ethyl-	Heterocyclic compound	C6H8O2	2407-43-4	966	0.255268	0.288217	0.265127	0.265405	0.251267	0.210726
KMW0097	114	113	114.014	2-Methyl-3-furanthiol	Heterocyclic compound	C5H6OS	28588-74-1	870	1.67063	1.44232	1.59057	1.86805	1.7291	1.51086
XMW1392	91	105	148.125	2-Methyl-7-exo-vinylbicyclo[4.2.0]oct-1(2)-ene	Hydrocarbons	C11H16	107914-89-6	1112	2.50892	2.75654	2.46297	4.47538	4.47113	4.03045
KMW0088	98	83	98.073	2-Hexenal, (E)-	Aldehyde	C6H10O	6728-26-3	854	0.773703	0.970495	0.853873	0	0	0
NMW0057	42	113	113.048	Glutarimide	Amine	C5H7NO2	1121-89-7	1154	0.0936179	0.127686	0.131586	0.134718	0.108576	0.11704
XMW0373	85	57	170.203	Undecane, 2-methyl-	Hydrocarbons	C12H26	7045-71-8	1164	0.08531	0.079665	0.0648328	0.0777628	0.0468405	0.0543699
XMW0422	57	71	198.235	3,5-Dimethyldodecane	Hydrocarbons	C14H30	107770-99-0	1285	0.181265	0.17477	0.153188	0.121933	0.116562	0.0904894
KMW0374	69	41	154.136	4-Hexen-1-ol, 5-methyl-2-(1-methylethenyl)-, (R)-	Terpenoids	C10H18O	498-16-8	1170	0.312916	0.366266	0.260423	0.354113	0.252033	0.253658
KMW0392	71	81	156.151	Cyclohexanol, 5-methyl-2-(1-methylethyl)-, (1.alpha.,2.alpha.,5.alpha.)-	Terpenoids	C10H20O	491-02-1	1187	9.85759	11.6555	12.0465	12.0811	11.2749	10.4106
XMW0670	94	68	95.048	Acetonitrile, 2,2'-iminobis-	Nitrogen compounds	C4H5N3	628-87-5	1108	2.16884	2.2806	2.08619	2.74342	2.54034	2.85186
KMW0254	83	55	152.12	1,5-Heptadien-4-one, 3,3,6-trimethyl-	Terpenoids	C10H16O	546-49-6	1062	0.179727	0.199799	0.146103	0.168069	0.208682	0.150646
XMW1069	67	82	170.131	Butanoic acid, 3-hexenyl ester, (E)-	Ester	C10H18O2	53398-84-8	1185	19.435	22.7389	23.1406	27.5624	25.8088	23.6924
KMW0458	136	121	196.146	p-Menth-8-en-3-ol, acetate	Ester	C12H20O2	89-49-6	1259	0.0425938	0.0992554	0.0676206	0.0664595	0.0565151	0.0511795
WMW0196	55	41	168.115	Lilac Aldehyde C	Aldehyde	C10H16O2	53447-48-6	1167	0.179785	0.20969	0.188413	0.178083	0.157339	0.149445
XMW0445	68	97	126.068	6-Ethyl-5,6-dihydro-2H-pyran-2-one	Heterocyclic compound	C7H10O2	19895-35-3	1160	0.368308	0.35054	0.36132	0.347385	0.312682	0.308229
XMW1310	85	57	158.131	Isobutyl isovalerate	Ester	C9H18O2	589-59-3	1005	0.111605	0.115273	0.144035	0.122445	0.0987077	0.0980724
XMW1209	71	70	158.131	Propanoic acid, 2-methyl-, 2-methylbutyl ester	Ester	C9H18O2	2445-69-4	1016	0.211666	0.380379	0.245753	0.0540223	0.0521509	0.0412738
D427	81	82	166.136	2-n-Heptylfuran	Heterocyclic compound	C11H18O	3777-71-7	1195	1.58454	1.8695	1.91785	2.12216	2.00314	1.83651
D311	109	81	152.12	3-p-Menthen-7-al	Aldehyde	C10H16O	27841-22-1	1169	0.0967994	0.109392	0.0962318	0.0919268	0.0775042	0.073606
KMW0362	95	41	154.136	Isoborneol	Terpenoids	C10H18O	124-76-5	1157	2.36786	1.87833	2.29518	2.27826	2.0082	2.0589
XMW1072	93	81	154.136	(E)-2,6-Dimethylocta-5,7-dien-2-ol	Alcohol	C10H18O	7643-60-9	1169	0.62552	0.699011	0.570282	0.604788	0.521995	0.539373
NMW0059	94	67	94.053	4-Aminopyridine	Heterocyclic compound	C5H6N2	504-24-5	1158	0.514499	0.5745	0.467939	0	0	0
XMW0358	110	95	152.084	1-Pentanone, 1-(2-furanyl)-	Heterocyclic compound	C9H12O2	3194-17-0	1176	0.311637	0.338076	0.274553	0.29839	0.264448	0.268563
XMW1217	109	124	166.099	3-Methyl-1-(3-methyl-2-furyl)-1-butanone	Heterocyclic compound	C10H14O2	488-05-1	1201	0.077684	0.0785589	0.0755379	0.0629291	0.0466465	0.045436
NMW0115	148	147	148.089	Anethole	Aromatics	C10H12O	104-46-1	1287	0.154957	0.193417	0.134234	0.129558	0.022814	0.135789
GMW0087	83	41	154.136	(E)-2-Decenal	Aldehyde	C10H18O	3913-81-3	1263	0.128096	0.213222	0.133603	0.254807	0.194658	0.200063
KMW0338	83	55	140.12	2-Nonenal, (E)-	Aldehyde	C9H16O	18829-56-6	1162	0.838943	0.690601	0.81916	0.788652	0.691774	0.702003
XMW0790	105	119	162.141	6,7-Dimethyl-1,2,3,5,8,8a-hexahydronaphthalene	Aromatics	C12H18	107914-92-1	1273	0	0	0	0.0308692	0.0388271	0.0276595
WMW0222	41	55	168.188	1-Dodecene	Hydrocarbons	C12H24	112-41-4	1190	6.96868	1.93703	1.85532	1.9559	1.70715	1.49652
XMW0238	85	57	184.219	Undecane, 4,4-dimethyl-	Hydrocarbons	C13H28	17312-68-4	1229	2.6969	3.21527	2.83739	2.52495	2.2689	2.00679
NMW0145	77	105	121.053	Benzamide	Amine	C7H7NO	55-21-0	1344	0.53878	0.576973	0.482244	0.465208	0.491161	0.425403
KMW0345	41	70	138.104	2,6-Nonadienal, (E,Z)-	Aldehyde	C9H14O	557-48-2	1155	0.160316	0.174059	0.174812	0.149408	0.122816	0.126663
KMW0354	41	69	140.12	2,6-Nonadien-1-ol	Alcohol	C9H16O	7786-44-9	1167	0.144793	0.165369	0.142413	0.127503	0.111519	0.106314
XMW1234	99	57	144.053	(2E)-2-(Acetylhydrazono)propanoic acid	Acid	C5H8N2O3	64096-81-7	1468	0.07121	0.0760908	0.0869595	0.149393	0.141451	0.137842
KMW0380	124	94	166.111	Pyrazine, 2-methoxy-3-(2-methylpropyl)-	Heterocyclic compound	C9H14N2O	24683-00-9	1181	7.33519	6.89912	5.6682	6.9362	5.65227	5.73112
WMW0083	57	41	156.151	2-Decen-1-ol, (E)-	Alcohol	C10H20O	18409-18-2	1257	0.0720904	0.0792128	0.0841856	0.0912757	0.0778124	0.0769881
D269	57	85	158.131	Butanoic acid, 2-methyl-, 2-methylpropyl ester	Ester	C9H18O2	2445-67-2	1004	0.40772	0.959514	0.891371	0.383192	0.419897	0.320598
KMW0383	97	57	142.063	2(5H)-Furanone, 5-ethyl-3-hydroxy-4-methyl-	Heterocyclic compound	C7H10O3	698-10-2	1195	0.665359	0.705808	0.646238	0.65664	0.489607	0.493925
WMW0104	69	55	142.136	Cyclooctanemethanol	Alcohol	C9H18O	3637-63-6	1073	0.346768	0.421846	0.395997	0.476491	0.443325	0.428232
XMW1240	99	70	186.162	Hexanoic acid, 2-methylbutyl ester	Ester	C11H22O2	2601-13-0	1247	0.034722	0.0413429	0.0363191	0	0	0
D329	79	81	152.12	Myroxide	Terpenoids	C10H16O	28977-57-3	1141	0	0	0	0.21431	0.1845	0.18218
WMW0041	41	55	152.12	Isopinocarveol	Terpenoids	C10H16O	6712-79-4	1178	1.78087	2.06982	2.12965	2.12393	1.9788	1.79309
XMW0100	71	57	156.188	Octane, 5-ethyl-2-methyl-	Hydrocarbons	C11H24	62016-18-6	986	0.170358	0.240025	0.257452	0.194969	0.194369	0.14903
XMW0026	60	73	130.099	Heptanoic Acid	Acid	C7H14O2	111-14-8	1080	0.0915028	0.103336	0.10513	0.11777	0.109563	0.110543
XMW1138	69	41	154.136	6-Octen-1-ol, 7-methyl-3-methylene-	Terpenoids	C10H18O	13066-51-8	1195	4.80098	5.52462	5.40591	4.41023	3.94782	3.6151
D417	82	67	142.099	3-Hexen-1-ol, acetate, (E)-	Ester	C8H14O2	3681-82-1	1005	1.56027	1.71168	1.69065	1.13035	1.0183	0.901841
WMW0103	67	68	114.104	2-Cyclopentylethanol	Alcohol	C7H14O	766-00-7	1003	2.39507	2.63738	2.57696	1.67101	1.5197	1.35828
NMW0010	66	39	132.094	Dicyclopentadiene	Hydrocarbons	C10H12	77-73-6	1003	0	0	0	0.0455711	0.0445833	0.0377076
XMW1208	42	41	70.028	1H-Tetrazole	Heterocyclic compound	CH2N4	288-94-8	1019	0.0642838	0.0649872	0.0739475	0.0767741	0.0721479	0.199633
KMW0176	108	111	126.104	5-Hepten-2-one, 6-methyl-	Ketone	C8H14O	110-93-0	986	0.571478	0.638188	0.621913	0.91733	0.846373	0.768291
KMW0489	68	79	150.104	1-Cyclohexene-1-carboxAldehyde, 4-(1-methylethenyl)-, (S)-	Aldehyde	C10H14O	18031-40-8	1207	0.623964	0.674182	0.672741	0.556443	0.458989	0.459071
D348	68	67	154.136	Cyclobutaneethanol, 1-methyl-2-(1-methylethenyl)-, cis-	Alcohol	C10H18O	30820-22-5	1183	0.554553	0.538737	0.451817	0.540106	0.443063	0.440359
KMW0158	77	106	106.042	BenzAldehyde	Aldehyde	C7H6O	100-52-7	960	2.25225	2.54621	2.54899	3.04918	2.37984	2.01499
KMW0642	57	71	226.266	Hexadecane	Hydrocarbons	C16H34	544-76-3	1600	0.0992005	0.134939	0.122585	0.182224	0.156261	0.13676
D358	57	82	198.162	4-tert-Butylcyclohexyl acetate	Ester	C12H22O2	32210-23-4	1368	0.51768	0.641618	0.559702	0.671512	0.605135	0.542864
XMW0122	83	55	154.136	Cyclohexanol, 2-methyl-3-(1-methylethenyl)-, (1.alpha.,2.alpha.,3.alpha.)-	Alcohol	C10H18O	54244-81-4	1196	1.40668	1.64195	1.41447	0.853127	0.739491	0.688952
XMW0637	70	42	112.089	Cyclobutanone, 2,2,3-trimethyl-	Ketone	C7H12O	1449-49-6	847	0.429637	0.47469	0.457896	0.124904	0.149334	0.112557
WMW0187	45	69	102.104	2-Hexanol	Alcohol	C6H14O	626-93-7	801	0.149789	0.143822	0.1553	0.0994451	0.102469	0.0943317
XMW0276	83	55	112.089	4-Hexen-3-one, 5-methyl-	Ketone	C7H12O	13905-10-7	1080	0.583336	0.653436	0.640305	0.8408	0.758023	0.711451
WMW0059	105	77	204.115	E-2-Hexenyl benzoate	Ester	C13H16O2	76841-70-8	1588	2.01873	2.04579	1.68984	4.35255	4.25339	3.69331
w05	69	41	220.183	2,6,10-Dodecatrienal, 3,7,11-trimethyl-	Terpenoids	C15H24O	19317-11-4	1656	0.192324	0.214001	0.135495	0.532927	0.47155	0.437084
KMW0736	151	166	166.063	Apocynin	Ketone	C9H10O3	498-02-2	1487	0.0444921	0.0687874	0.039668	0.0594124	0.0550134	0.0613305
WMW0087	71	43	158.131	Butanoic Acid, 3-methylbutyl ester	Ester	C9H18O2	106-27-4	1056	0.200835	0.213014	0.21878	0.295621	0.269917	0.235763
KMW0199	41	93	136.125	.beta.-Myrcene	Terpenoids	C10H16	123-35-3	991	0.911744	0.901583	1.21822	2.81644	2.61308	2.83471
KMW0603	161	105	204.188	Germacrene D	Terpenoids	C15H24	23986-74-5	1481	0.261667	0.364824	0.222359	0.663453	0.581545	0.513947
D405	45	91	136.089	Benzene, (2-methoxyethyl)-	Aromatics	C9H12O	3558-60-9	1086	0.100527	0.120782	0.11159	0.169775	0.15158	0.138673
WMW0092	44	58	143.167	1-OctanAmine,N-methyl-	Amine	C9H21N	2439-54-5	1088	0.0676188	0.0790297	0.0749535	0.113303	0.116212	0.0973616
NMW0072	93	41	154.136	(1.alpha.,2.beta.,5.alpha.)-2-methyl-5-(1-methylethenyl)-Cyclohexanol	Terpenoids	C10H18O	38049-26-2	1192	2.28191	2.46968	2.36586	2.19343	1.89296	1.79179
